# Supplementary material for: Shifts in the human gut microbiome during cancer chemotherapy are diet-dependent
Source: bioRxiv preprint, doi:10.64898/2025.12.23.696294, version 1 (2025-12-23)
Supplement: Supplemental Tables [file 696294_file02.xlsx]

## Sheet: TableS1
	Table S1: Clinical characteristics.
	Characteristic+	Subjects with diet information	All GO subjects
	Total subjects	35	40
	Age (years, mean ± s.d.)	53.0 ± 11.1	52.5 ± 10.5
	BMI (kg/m2, mean ± s.d.)	26.2 ± 4.0	24.8 ± 4.8
	Sex
	Male	18 (51%)	20 (50%)
	Female	17 (49%)	20 (50%)
	Race (self-reported)
	White	29* (83%)	32* (80%)
	Asian	4 (11%)	4 (10%)
	Black/African American	1 (3%)	2 (5%)
	Unknown	2 (6%)	3 (8%)
	Ethnicity (self-reported)
	Hispanic or Latino	2 (6%)	3 (8%)
	Not Hispanic or Latino	30 (86%)	34 (85%)
	Unknown	3 (9%)	3 (8%)
	Cohort
	A: CAP as standard-of-care	20 (57%)	21 (53%)
	B: TAS102	6 (17%)	9 (23%)
	C: CAP + pembrolizumab	9 (26%)	10 (25%)
	Location of primary tumor
	Cecum/ascending	7 (20%)	7 (18%)
	Transverse	4 (11%)	6 (15%)
	Descending/sigmoid	11 (31%)	11 (28%)
	Rectosigmoid	3 (9%)	3 (8%)
	Rectum	10 (29%)	13 (33%)
	TNM Stage at Diagnosis
	I	2 (6%)	2 (5%)
	II	3 (9%)	4 (10%)
	III	18 (51%)	22 (55%)
	IV	11 (31%)	11 (28%)
	Unknown	1 (3%)	1 (3%)
	Prior surgical resection of primary
	Yes	23 (66%)	27 (68%)
	No	12 (34%)	13 (32%)
	Ostomy
	Colostomy (present)	2 (6%)	2 (5%)
	Colostomy (reversed)	1 (3%)	2 (5%)
	Ileostomy (present)	0 (0%)	1 (3%)
	None	32 (91%)	35 (88%)
	Metastases present
	Yes	18 (51%)	21 (53%)
	No	17 (49%)	19 (48%)
	+All categorical data is displayed as n (%). Percentages may exceed 100% due to rounding.
	*Totals exceed the total number of subjects because of one subject who identified as both Black/African American and White.

## Sheet: TableS2
	Table S2: Excluded dietary features.
	Excluded variable	Kept variable	Reason
	V_STARCHY_POTATO	V_STARCHY_TOTAL	Pearson rho > 0.85
	A_DRINKS	ALC	Pearson rho > 0.85
	V_LEGUMES	PF_LEGUMES	Pearson rho > 0.85
	P182	PFAT	Pearson rho > 0.85
	M181	MFAT	Pearson rho > 0.85
	FDFE	FOLA	Pearson rho > 0.85
	V_REDOR_TOMATO	V_REDOR_TOTAL	Pearson rho > 0.85
	SOLID_FATS	SFAT	Pearson rho > 0.85
	S080	SFAT	Pearson rho > 0.85
	S100	SFAT	Pearson rho > 0.85
	S120	SFAT	Pearson rho > 0.85
	S140	SFAT	Pearson rho > 0.85
	P205	P226	Pearson rho > 0.85
	P225	P226	Pearson rho > 0.85
	P184	P226	Pearson rho > 0.85
	CHOLN	CHOLE	Pearson rho > 0.85
	P204	CHOLE	Pearson rho > 0.85
	LZ	VK	Pearson rho > 0.85
	VITE_ADD	-	0 consumption in >60% of timepoints
	V_STARCHY_OTHER	-	0 consumption in >60% of timepoints
	PF_ORGAN	-	0 consumption in >60% of timepoints
	PF_SEAFD_HI	-	0 consumption in >60% of timepoints
	PF_SEAFD_LOW	-	0 consumption in >60% of timepoints
	PF_SOY	-	0 consumption in >60% of timepoints

## Sheet: TableS3
	Table S3: List of dietary features included for analysis.
	ASA24 name	Name(s) in figures (separated by commas)	Description+
	ACAR		Carotene, alpha (mcg)
	ADD_SUGARS	Added sugars	Foods defined as added sugars (tsp. eq.)
	ALC		Alcohol (g)
	ATOC	Vitamin E	Vitamin E, alpha-tocopherol (mg)
	B12_ADD	Added B12	Added Vitamin B12 (mcg)
	BCAR		Carotene, beta (mcg)
	CAFF	Caffeine	Caffeine (mg)
	CALC		Calcium (mg)
	CARB	Carbohydrate, Carbohydrates	Carbohydrate (% kcal)
	CHOLE		Cholesterol (mg)
	COPP	Copper	Copper (mg)
	CRYP		Cryptoxanthin, beta (mcg)
	D_CHEESE		Cheeses (cup eq.)
	D_MILK	Milk	Fluid milk, buttermilk, evaporated milk, dry milk, and calcium fortified soy milk (cup eq.)
	D_TOTAL		Total milk, yogurt, cheese, whey. For some foods, the total dairy values could be higher than sum of D_MILK, D_YOGURT, and D_CHEESE because Misc dairy component composed of whey which is not included in FPED as separate variable. (cup eq.)
	D_YOGURT	Yogurt	Yogurt (cup eq.)
	F_CITMLB	Citrus, melons, berries	Intact fruits (whole or cut) of citrus, melons, and berries (cup eq.)
	F_JUICE	Fruit juice	Fruit juices, citrus and non citrus (cup eq.)
	F_OTHER		Intact fruits (whole or cut); excluding citrus, melons, and berries (cup eq.)
	F_TOTAL	Total fruits	Total intact fruits (whole or cut) and fruit juices (cup eq.)
	FA		Folic acid (mcg)
	FF	Food folate	Folate, food (mcg)
	FIBE	Fiber	Fiber, total dietary (g)
	FOLA	Folate	Folate, total (mcg)
	G_REFINED	Refined grains	Refined grains that do not contain all of the components of the entire grain kernel (oz. eq.)
	G_TOTAL		Total whole and refined grains (oz. eq.)
	G_WHOLE	Whole grains	Grains defined as whole grains and contain the entire grain kernel ? the bran, germ, and endosperm (oz. eq.)
	HEI	Healthy eating index, HEI	Healthy eating index
	IRON	Iron	Iron (mg)
	KCAL	Energy, Energy intake	Energy (kcal)
	LYCO		Lycopene (mcg)
	M161	MUFA 16:1	16:1, Hexadecenoic acid, undifferentiated (g)
	M201		20:1, Eicosenoic acid, undifferentiated (g)
	M221		22:1, Docosenoic acid, undifferentiated (g)
	MAGN	Magnesium	Magnesium (mg)
	MFAT		Fatty acids, total monounsaturated (g)
	MOIS		Water (g)
	NIAC		Niacin (mg)
	OILS	Oils	Fats naturally present in nuts, seeds, seafood; unhydrogenated vegetable oils, except palm oil, palm kernel oil, coconut oils; fat in avocado and olives above allowable amount; 50% of fat present in stick/tub margarines, margarine spreads (grams)
	P183	PUFA 18:3	18:3, Octadecatrienoic acid (g)
	P226		22:6 n-3, Docosahexaenoic acid [DHA] (g)
	PF_CUREDMEAT		Frankfurters, sausages, corned beef, and luncheon meat that are made from beef, pork, or poultry (oz. eq.)
	PF_EGGS	Eggs	Eggs (chicken, duck, goose, quail) and egg substitutes (oz. eq.)
	PF_LEGUMES	Legumes	Beans and Peas (legumes) computed as protein foods (oz. eq.)
	PF_MEAT		Beef, veal, pork, lamb, and game meat; excludes organ meat and cured meat (oz. eq.)
	PF_MPS_TOTAL	Meat, poultry, seafood	Total of meat, poultry, seafood, organ meat, and cured meat (oz. eq.)
	PF_NUTSDS	Nuts and seeds, Nuts	Peanuts, tree nuts, and seeds; excludes coconut (oz. eq.)
	PF_POULT		Chicken, turkey, Cornish hens, duck, goose, quail, and pheasant (game birds); excludes organ meat and cured meat (oz. eq.)
	PF_TOTAL	Protein foods	Total meat, poultry, organ meat, cured meat, seafood, eggs, soy, and nuts and seeds; excludes legumes (oz. eq.)
	PFAT	Polyunsaturated fat	Fatty acids, total polyunsaturated (g)
	PHOS	Phosphorus	Phosphorus (mg)
	POTA		Potassium (mg)
	PROT		Protein (% kcal)
	RET		Retinol (mcg)
	S040		4:0, Butanoic acid (g)
	S060		6:0, Hexanoic acid (g)
	S160		16:0, Hexadecanoic acid (g)
	S180	SFA 18:0	18:0, Octadecanoic acid (g)
	SELE	Selenium	Selenium (mcg)
	SFAT	Saturated fat, Sat. fat	Fatty acids, total saturated (g)
	SODI	Sodium	Sodium (mg)
	SUGR	Sugar	Sugars, total (g)
	TFAT	Fat	Fat (% kcal)
	THEO	Theobromine, Theo.	Theobromine (mg)
	V_DRKGR	Dark, leafy greens	Dark green vegetables (cup eq.)
	V_OTHER	Other vegetables	Other vegetables not in the vegetable components listed above (cup eq.)
	V_REDOR_OTHER	Red/orange vegetables	Other red and orange vegetables, excluding tomatoes and tomato products (cup eq.)
	V_REDOR_TOTAL		Total red and orange vegetables (tomatoes and tomato products + other red and orange vegetables) (cup eq.)
	V_STARCHY_TOTAL	Starchy vegetables, Starchy veg.	Total starchy vegetables (white potatoes + other starchy vegetables) (cup eq.)
	V_TOTAL		Total dark green, red and orange, starchy, and other vegetables; excludes legumes (cup eq.)
	VARA	Vitamin A	Vitamin A, RAE (mcg_RAE)
	VB1		Thiamin (mg)
	VB12	Vitamin B12	Vitamin B12 (mcg)
	VB2		Riboflavin (mg)
	VB6	Vitamin B6	Vitamin B6 (mg)
	VC	Vitamin C	Vitamin C (mg)
	VITD	Vitamin D	Vitamin D (D2 + D3) (mcg)
	VK	Vitamin K1	Vitamin K, phylloquinone (mcg)
	ZINC	Zinc	Zinc (mg)
	Includes all dereplicated ASA24 diet variables (see Table S2) and HEI.
	+Description from NCI ASA24 Data Dictionary for most variables. CARB, PROT, TFAT were normalized to %KCAL rather than reported in the ASA24 units of grams (g). HEI was calculated from ASA24 variables as described in Methods.

## Sheet: TableS4
	Table S4: 16S rRNA gene sequencing metadata.
	Sample ID	Paired ASA24 available	Patient ID	Timepoint	Reads	Number of ASVs	Sequencing batch
	Blank-Batch6		NA	NA	107	3	1
	Blank-Batch7		NA	NA	165	3	2
	GO-Pt1-Baseline		1	Baseline	93298	153	1
	GO-Pt1-C1D1	Yes	1	C1D1	41119	136	1
	GO-Pt1-C1D3		1	C1D3	118191	174	1
	GO-Pt1-C1D7		1	C1D7	87528	121	1
	GO-Pt1-C2D1	Yes	1	C2D1	158028	171	1
	GO-Pt1-C3D1	Yes	1	C3D1	30263	104	3
	GO-Pt1-Final		1	Final	27359	121	3
	GO-Pt11-Baseline		11	Baseline	76533	100	1
	GO-Pt11-C1D3		11	C1D3	111739	108	1
	GO-Pt11-C1D7		11	C1D7	108499	100	1
	GO-Pt11-C2D1		11	C2D1	80178	116	1
	GO-Pt12-Baseline		12	Baseline	122691	124	1
	GO-Pt12-C1D1	Yes	12	C1D1	95905	130	1
	GO-Pt12-C1D3		12	C1D3	122388	127	1
	GO-Pt12-C1D7		12	C1D7	167152	138	1
	GO-Pt12-C2D1	Yes	12	C2D1	146843	138	1
	GO-Pt12-C3D1	Yes	12	C3D1	183855	109	1
	GO-Pt13-Baseline		13	Baseline	104584	293	1
	GO-Pt13-C1D1	Yes	13	C1D1	180384	343	1
	GO-Pt13-C1D3		13	C1D3	76624	240	1
	GO-Pt13-C1D7		13	C1D7	94165	226	1
	GO-Pt13-C2D1	Yes	13	C2D1	84156	247	1
	GO-Pt13-C3D1	Yes	13	C3D1	63120	250	1
	GO-Pt14-Baseline		14	Baseline	106305	253	1
	GO-Pt14-C1D1	Yes	14	C1D1	177672	309	1
	GO-Pt14-C1D3		14	C1D3	101366	245	1
	GO-Pt14-C2D1	Yes	14	C2D1	140334	280	1
	GO-Pt14-C3D1	Yes	14	C3D1	94434	256	1
	GO-Pt14-Final		14	Final	45090	232	2
	GO-Pt15-Baseline		15	Baseline	105579	260	1
	GO-Pt15-C1D1		15	C1D1	189289	247	1
	GO-Pt15-C1D3		15	C1D3	78538	165	2
	GO-Pt15-C1D7		15	C1D7	47643	144	1
	GO-Pt15-C2D1	Yes	15	C2D1	63578	243	1
	GO-Pt17-Baseline		17	Baseline	95230	227	1
	GO-Pt17-C1D1	Yes	17	C1D1	87359	226	1
	GO-Pt17-C1D7		17	C1D7	125586	232	1
	GO-Pt17-C2D1		17	C2D1	137519	300	1
	GO-Pt17-C3D1		17	C3D1	16476	128	2
	GO-Pt17-Final		17	Final	48075	79	2
	GO-Pt18-Baseline		18	Baseline	89523	81	1
	GO-Pt18-C1D1	Yes	18	C1D1	86473	78	1
	GO-Pt18-C1D3		18	C1D3	190615	98	1
	GO-Pt18-C1D7		18	C1D7	63789	77	1
	GO-Pt18-C2D1	Yes	18	C2D1	114854	77	1
	GO-Pt18-C3D1	Yes	18	C3D1	124979	77	1
	GO-Pt19-Baseline	Yes	19	Baseline	93653	193	1
	GO-Pt19-C1D3		19	C1D3	142915	208	1
	GO-Pt19-C1D7		19	C1D7	139106	257	1
	GO-Pt19-C2D1		19	C2D1	199838	218	1
	GO-Pt19-C3D1		19	C3D1	85116	204	1
	GO-Pt2-Baseline		2	Baseline	77102	89	1
	GO-Pt2-C1D1	Yes	2	C1D1	102547	114	1
	GO-Pt2-C1D3		2	C1D3	107223	76	1
	GO-Pt2-C1D7		2	C1D7	66318	75	1
	GO-Pt2-C2D1	Yes	2	C2D1	86304	80	1
	GO-Pt2-C3D1	Yes	2	C3D1	160919	135	1
	GO-Pt20-Baseline		20	Baseline	14289	89	2
	GO-Pt20-C1D1	Yes	20	C1D1	374196	183	1
	GO-Pt20-C1D3		20	C1D3	107350	133	1
	GO-Pt20-C1D7		20	C1D7	105709	146	1
	GO-Pt20-C2D1	Yes	20	C2D1	79870	130	1
	GO-Pt20-C3D1		20	C3D1	91925	134	1
	GO-Pt21-Baseline		21	Baseline	98740	94	1
	GO-Pt21-C1D1	Yes	21	C1D1	81150	89	1
	GO-Pt21-C1D3		21	C1D3	24987	77	2
	GO-Pt21-C1D7		21	C1D7	146172	94	1
	GO-Pt22-Baseline		22	Baseline	75969	154	2
	GO-Pt22-C1D1	Yes	22	C1D1	73659	165	2
	GO-Pt22-C1D3		22	C1D3	44061	119	2
	GO-Pt22-C1D7		22	C1D7	29059	87	2
	GO-Pt22-C2D1		22	C2D1	51019	141	2
	GO-Pt23-Baseline		23	Baseline	49277	200	2
	GO-Pt23-C1D1	Yes	23	C1D1	43637	203	2
	GO-Pt23-C1D3		23	C1D3	13977	118	2
	GO-Pt23-C1D7		23	C1D7	37233	173	2
	GO-Pt23-C2D1		23	C2D1	52341	176	2
	GO-Pt23-C3D1		23	C3D1	66562	204	2
	GO-Pt24-Baseline		24	Baseline	25014	158	2
	GO-Pt24-C1D1		24	C1D1	84546	234	2
	GO-Pt25-Baseline		25	Baseline	10294	153	2
	GO-Pt25-C1D1	Yes	25	C1D1	42982	263	2
	GO-Pt25-C1D3		25	C1D3	55329	280	2
	GO-Pt25-C2D1	Yes	25	C2D1	33641	239	2
	GO-Pt25-C3D1	Yes	25	C3D1	32271	208	2
	GO-Pt25-Final	Yes	25	Final	18369	198	2
	GO-Pt29-Baseline		29	Baseline	56607	206	2
	GO-Pt29-C1D1	Yes	29	C1D1	24948	176	2
	GO-Pt29-C1D3		29	C1D3	41934	177	2
	GO-Pt29-C2D1	Yes	29	C2D1	20221	169	2
	GO-Pt29-C3D1		29	C3D1	49519	213	2
	GO-Pt30-Baseline		30	Baseline	43797	187	2
	GO-Pt30-C1D1		30	C1D1	35553	161	2
	GO-Pt30-C1D3		30	C1D3	25783	123	2
	GO-Pt30-C3D1		30	C3D1	62367	188	2
	GO-Pt31-Baseline		31	Baseline	42715	155	2
	GO-Pt31-C1D1	Yes	31	C1D1	42772	193	2
	GO-Pt31-C1D3		31	C1D3	84333	291	2
	GO-Pt31-C1D7		31	C1D7	82015	292	2
	GO-Pt31-C2D1	Yes	31	C2D1	52174	239	2
	GO-Pt31-C3D1	Yes	31	C3D1	19414	186	2
	GO-Pt31-Final	Yes	31	Final	92641	293	2
	GO-Pt32-Baseline		32	Baseline	14830	111	2
	GO-Pt32-C1D1	Yes	32	C1D1	45748	144	2
	GO-Pt32-C1D3		32	C1D3	54114	155	2
	GO-Pt32-C1D7		32	C1D7	63100	115	2
	GO-Pt32-C2D1	Yes	32	C2D1	12238	99	2
	GO-Pt33-Baseline		33	Baseline	46409	92	2
	GO-Pt33-C1D1		33	C1D1	31352	88	2
	GO-Pt33-C1D3		33	C1D3	54191	94	2
	GO-Pt33-C1D7		33	C1D7	35095	101	2
	GO-Pt33-C2D1	Yes	33	C2D1	56020	147	2
	GO-Pt33-Final		33	Final	29242	113	2
	GO-Pt34-Baseline		34	Baseline	45480	47	2
	GO-Pt34-C1D1	Yes	34	C1D1	43199	44	2
	GO-Pt34-C1D3		34	C1D3	34760	38	2
	GO-Pt35-Baseline		35	Baseline	38491	67	2
	GO-Pt35-C1D1	Yes	35	C1D1	32381	57	2
	GO-Pt35-C1D3		35	C1D3	23605	52	2
	GO-Pt35-C1D7		35	C1D7	36142	72	2
	GO-Pt35-C2D1	Yes	35	C2D1	26999	55	2
	GO-Pt35-C3D1		35	C3D1	48454	71	2
	GO-Pt35-Final		35	Final	58818	68	2
	GO-Pt38-Baseline		38	Baseline	24923	94	2
	GO-Pt38-C1D1	Yes	38	C1D1	40781	122	2
	GO-Pt38-C1D3		38	C1D3	32524	112	2
	GO-Pt38-C1D7		38	C1D7	43889	106	2
	GO-Pt38-C2D1	Yes	38	C2D1	39046	118	2
	GO-Pt38-C3D1	Yes	38	C3D1	26685	102	2
	GO-Pt38-Final	Yes	38	Final	64194	134	2
	GO-Pt39-Baseline		39	Baseline	17444	35	2
	GO-Pt4-Baseline		4	Baseline	115157	185	1
	GO-Pt4-C1D1	Yes	4	C1D1	167061	249	1
	GO-Pt4-C1D3		4	C1D3	80069	144	1
	GO-Pt4-C2D1	Yes	4	C2D1	85953	184	1
	GO-Pt4-C3D1	Yes	4	C3D1	76466	176	1
	GO-Pt40-Baseline		40	Baseline	23314	172	2
	GO-Pt40-C1D3		40	C1D3	90844	281	2
	GO-Pt40-C1D7		40	C1D7	23970	200	2
	GO-Pt42-Baseline		42	Baseline	61568	190	2
	GO-Pt42-C1D1	Yes	42	C1D1	36325	124	2
	GO-Pt42-C1D3		42	C1D3	43743	154	2
	GO-Pt42-C1D7		42	C1D7	31902	127	2
	GO-Pt42-C2D1	Yes	42	C2D1	44773	175	2
	GO-Pt42-C3D1	Yes	42	C3D1	39590	101	2
	GO-Pt42-Final	Yes	42	Final	46369	131	2
	GO-Pt43-Baseline		43	Baseline	43006	154	2
	GO-Pt43-C1D1	Yes	43	C1D1	29142	112	2
	GO-Pt43-C1D3		43	C1D3	38377	139	2
	GO-Pt43-C1D7		43	C1D7	58000	133	2
	GO-Pt43-C2D1	Yes	43	C2D1	11112	94	2
	GO-Pt43-C3D1	Yes	43	C3D1	58357	145	2
	GO-Pt43-Final	Yes	43	Final	49551	93	2
	GO-Pt44-Baseline		44	Baseline	40299	221	2
	GO-Pt44-C1D1	Yes	44	C1D1	44173	243	2
	GO-Pt44-C1D3		44	C1D3	25074	215	2
	GO-Pt44-C1D7		44	C1D7	33471	200	2
	GO-Pt44-C2D1		44	C2D1	77875	232	2
	GO-Pt45-Baseline		45	Baseline	63645	212	2
	GO-Pt45-C1D1	Yes	45	C1D1	20547	154	2
	GO-Pt45-C1D3		45	C1D3	41156	189	2
	GO-Pt45-C1D7		45	C1D7	40596	187	2
	GO-Pt45-C2D1	Yes	45	C2D1	27730	175	2
	GO-Pt45-C3D1	Yes	45	C3D1	58568	203	2
	GO-Pt45-Final	Yes	45	Final	38770	154	2
	GO-Pt47-Baseline		47	Baseline	40347	45	2
	GO-Pt47-C1D1	Yes	47	C1D1	23444	48	2
	GO-Pt47-C1D3		47	C1D3	37558	51	2
	GO-Pt47-C1D7		47	C1D7	30926	52	2
	GO-Pt47-C2D1	Yes	47	C2D1	62403	62	2
	GO-Pt50-Baseline		50	Baseline	29969	192	2
	GO-Pt50-C1D1	Yes	50	C1D1	36462	214	2
	GO-Pt50-C1D3		50	C1D3	45495	232	2
	GO-Pt50-C1D7		50	C1D7	23848	207	2
	GO-Pt50-C2D1	Yes	50	C2D1	78715	265	2
	GO-Pt50-C3D1	Yes	50	C3D1	48803	257	2
	GO-Pt50-Final	Yes	50	Final	46411	242	2
	GO-Pt51-Baseline		51	Baseline	47569	138	3
	GO-Pt51-C1D1	Yes	51	C1D1	38919	142	3
	GO-Pt51-C1D3		51	C1D3	34577	132	3
	GO-Pt51-C1D7		51	C1D7	33157	129	3
	GO-Pt51-C2D1	Yes	51	C2D1	10505	78	3
	GO-Pt51-C3D1	Yes	51	C3D1	35806	136	3
	GO-Pt51-Final		51	Final	55396	80	3
	GO-Pt52-Baseline		52	Baseline	40460	102	3
	GO-Pt52-C1D1	Yes	52	C1D1	41285	103	3
	GO-Pt52-C1D3		52	C1D3	57516	120	3
	GO-Pt52-C1D7		52	C1D7	50026	89	3
	GO-Pt52-C2D1	Yes	52	C2D1	26039	82	3
	GO-Pt52-C3D1	Yes	52	C3D1	14386	49	3
	GO-Pt52-Final		52	Final	35231	72	33
	GO-Pt53-Baseline		53	Baseline	27184	90	3
	GO-Pt53-C1D1	Yes	53	C1D1	52876	106	3
	GO-Pt53-C1D3		53	C1D3	38811	102	3
	GO-Pt53-C1D7		53	C1D7	114546	137	3
	GO-Pt53-C2D1		53	C2D1	24208	96	3
	GO-Pt54-Baseline		54	Baseline	61783	112	3
	GO-Pt54-C1D1	Yes	54	C1D1	33062	103	3
	GO-Pt54-C1D3		54	C1D3	32567	121	3
	GO-Pt54-C1D7		54	C1D7	38772	112	3
	GO-Pt54-C3D1	Yes	54	C3D1	36552	129	3
	GO-Pt54-Final	Yes	54	Final	9769	95	3
	GO-Pt6-C1D1		6	C1D1	125912	184	1
	GO-Pt6-C1D3		6	C1D3	90583	199	1
	GO-Pt6-C1D7		6	C1D7	135012	199	1
	GO-Pt6-C2D1	Yes	6	C2D1	73842	200	1
	GO-Pt6-C3D1	Yes	6	C3D1	122050	172	1
	GO-Pt7-Baseline		7	Baseline	102924	112	1
	GO-Pt7-C1D1	Yes	7	C1D1	77017	118	1
	GO-Pt7-C1D3		7	C1D3	66790	86	1
	GO-Pt7-C1D7		7	C1D7	153415	153	1
	GO-Pt7-C2D1	Yes	7	C2D1	511763	83	1
	GO-Pt9b-Baseline		9	Baseline	26267	171	2
	GO-Pt9b-C1D1	Yes	9	C1D1	37500	230	2
	GO-Pt9b-C1D3		9	C1D3	36511	210	2
	GO-Pt9b-C2D1	Yes	9	C2D1	33178	198	2
	GO-Pt9b-C3D1	Yes	9	C3D1	56370	208	2

## Sheet: TableS5
	Table S5: List of ASVs altered during chemotherapy included for analysis.
	ASV	ASVID	Sequence	Change during chemotherapy	Significant diet interactions	Phylum	Class	Order	Family	Genus	Species	Species_ambiguous
	5f8d35126b0a7321413d21487ec72b73	ASV1	TACGTAGGTGGCAAGCGTTATCCGGAATCATTGGGCGTAAAGGGTGCGTAGGTGGCGTACTAAGTCTGTAGTAAAAGGCAATGGCTCAACCATTGTAAGCTATGGAAACTGGTATGCTGGAGTGCAGAAGAGGGCGATGGAATTCCATGTGTAGCGGTAAAATGCGTAGATATATGGAGGAACACCAGTGGCGAAGGCGGTCGCCTGGTCTGTAACTGACACTGAGGCACGAAAGCGTGGGGAGCAAATAGG	Depleted		Firmicutes	Bacilli	Erysipelotrichales	Erysipelotrichaceae	[Clostridium] innocuum group	NA	aff./innocuum
	8e175abe6a746b8f33bae9cd7c8192bb	ASV2	AACGTAGGTCACAAGCGTTGTCCGGAATTACTGGGTGTAAAGGGAGCGCAGGCGGGAGAACAAGTTGGAAGTGAAATCCATGGGCTCAACCCATGAACTGCTTTCAAAACTGTTTTTCTTGAGTAGTGCAGAGGTAGGCGGAATTCCCGGTGTAGCGGTGGAATGCGTAGATATCGGGAGGAACACCAGTGGCGAAGGCGGCCTACTGGGCACCAACTGACGCTGAGGCTCGAAAGTGTGGGTAGCAAACAGG	Depleted	Positive interaction with vitamin K1	Firmicutes	Clostridia	Oscillospirales	Ruminococcaceae	Faecalibacterium	prausnitzii	prausnitzii
	119eea33cb9f505d6a20297d132e792a	ASV3	TACGTAGGGGGCAAGCGTTATCCGGATTTACTGGGTGTAAAGGGAGCGTAGACGGTAAAGCAAGTCTGAAGTGAAAGCCCGGGGCTCAACCCCGGGACTGCTTTGGAAACTGTTTAACTAGAGTGCTGGAGAGGTAAGCGGAATTCCTAGTGTAGCGGTGAAATGCGTAGATATTAGGAGGAACACCAGTGGCGAAGGCGGCTTACTGGACAGTAACTGACGTTGAGGCTCGAAAGCGTGGGGAGCAAACAGG	Enriched	Negative interaction with starchy vegetables	Firmicutes	Clostridia	Lachnospirales	Lachnospiraceae	Lachnoclostridium	NA	edouardi
	581a55014641e1cd55cdc272c0365a28	ASV4	TACGTAGGTGGCAAGCGTTATCCGGATTTATTGGGCGTAAAGAGAGTGCAGGCGGTTTTCTAAGTCTGATGTGAAAGCCTTCGGCTTAACCGGAGAAGTGCATCGGAAACTGGATAACTTGAGTGCAGAAGAGGGTAGTGGAACTCCATGTGTAGCGGTGGAATGCGTAGATATATGGAAGAACACCAGTGGCGAAGGCGGCTACCTGGTCTGCAACTGACGCTGAGACTCGAAAGCATGGGTAGCGAACAGG	Enriched	Positive interaction with vitamin B12 Negative interaction with energy (kcal) Negative interaction with copper Negative interaction with folate	Firmicutes	Bacilli	Lactobacillales	Lactobacillaceae	Lactobacillus	fermentum	casei/curvatus/delbrueckii/fermentum/hilgardii/ingluviei/oris/parabuchneri/paracasei/paralimentarius/paraplantarum/pentosus/plantarum/reuteri/sakei
	5f25904e073fe5c114cadfde74349518	ASV5	TACGTAGGGGGCAAGCGTTATCCGGATTTACTGGGTGTAAAGGGAGCGTAGACGGCGATGCAAGTCTGAAGTGAAATACCCGGGCTCAACCTGGGAACTGCTTTGGAAACTGTATGGCTAGAGTGCTGGAGAGGTAAGCGGAATTCCTAGTGTAGCGGTGAAATGCGTAGATATTAGGAAGAACACCAGTGGCGAAGGCGGCTTACTGGACAGTAACTGACGTTCAGGCTCGAAAGCGTGGGGAGCAAACAGG	Depleted		Firmicutes	Clostridia	Lachnospirales	Lachnospiraceae	Lachnospiraceae UCG-004	NA	NA
	cb3bfa7ac2b500c6a49d88ce9412dbea	ASV6	TACGTAGGTGGCGAGCGTTATCCGGAATCATTGGGCGTAAAGGGTGCGTAGGTGGCACGATAAGTCTGTAGTAAAAGGCAGCGGCTCAACCGCTGTTGGCTATGGAAACTGTCGAGCTGGAGTGCAGAAGAGGGCGATGGAATTCCATGTGTAGCGGTAAAATGCGTAGATATATGGAGGAACACCAGTGGCGAAGGCGGCCGCCTGGTCTGCAACTGACACTGAAGCACGAAAGCGTGGGGAGCAAATAGG	Depleted		Firmicutes	Bacilli	Erysipelotrichales	Erysipelotrichaceae	NA	NA	NA
	e367dacc4cf58de7164775e5899d4ab2	ASV7	TACGTAGGGAGCGAGCGTTGTCCGGATTTACTGGGTGTAAAGGGTGCGTAGGCGGATCTGCAAGTCAGTAGTGAAATCCCAGGGCTTAACCCTGGAACTGCTATTGAAACTGTGGGTCTTGAGTGAGGTAGAGGCAGGCGGAATTCCCGGTGTAGCGGTGAAATGCGTAGAGATCGGGAGGAACACCAGTGGCGAAGGCGGCCTGCTGGGCCTTAACTGACGCTGAGGCACGAAAGCATGGGTAGCAAACAGG	Depleted		Firmicutes	Clostridia	Oscillospirales	Ruminococcaceae	DTU089	NA	NA
	0a035a7ec1f4a194dd7fbda3c5660db0	ASV8	TACGTAGGGGGCAAGCGTTATCCGGATTTACTGGGTGTAAAGGGAGCGCAGACGGCGATGCAAGTCTGGAGTGAAAGCCCGGGGCTCAACCCCGGGACTGCTTTGGAAACTGTATGGCTAGAGTGCTGGAGAGGCAAGCGGAATTCCTAGTGTAGCGGTGAAATGCGTAGATATTAGGAAGAACACCAGTGGCGAAGGCGGCTTGCTGGACAGTAACTGACGTTCAGGCTCGAAAGCGTGGGGAGCAAACAGG	Enriched		Firmicutes	Clostridia	Lachnospirales	Lachnospiraceae	Lachnoclostridium	NA	NA
	2e4f2b53b856c4def6d021d01f5abb70	ASV9	TACGTAGGGGGCAAGCGTTATCCGGATTTACTGGGTGTAAAGGGAGCGTAGACGGCACGGCAAGCCAGATGTGAAAGCCCGGGGCTCAACCCCGGGACTGCATTTGGAACTGCTGAGCTAGAGTGTCGGAGAGGCAAGTGGAATTCCTAGTGTAGCGGTGAAATGCGTAGATATTAGGAGGAACACCAGTGGCGAAGGCGGCTTGCTGGACGATGACTGACGTTGAGGCTCGAAAGCGTGGGGAGCAAACAGG	Enriched	Negative interaction with legumes	Firmicutes	Clostridia	Lachnospirales	Lachnospiraceae	Dorea	NA	longicatena
	c48070f3061b086b60ff32f77e0002fa	ASV10	AACGTAGGGTGCAAGCGTTGTCCGGAATTACTGGGTGTAAAGGGAGCGCAGGCGGGAAGACAAGTTGGAAGTGAAAACCATGGGCTCAACCCATGAATTGCTTTCAAAACTGTTTTTCTTGAGTAGTGCAGAGGTAGATGGAATTCCCGGTGTAGCGGTGGAATGCGTAGATATCGGGAGGAACACCAGTGGCGAAGGCGGTCTACTGGGCACCAACTGACGCTGAGGCTCGAAAGCATGGGTAGCAAACAGG	Depleted		Firmicutes	Clostridia	Oscillospirales	Ruminococcaceae	Subdoligranulum	NA	NA
	69310a7cff9f6b902cdfd08243784ace	ASV11	TACGTAGGGGGCAAGCGTTATCCGGATTTACTGGGTGTAAAGGGAGCGTAGACGGCGAGGCAAGTCTGATGTGAAAGCCTGGGGCTTAACCCCGGAACTGCATTGGAAACTGCTTTGCTGGAGTGCCGGAGAGGTAAGCGGAATTCCTAGTGTAGCGGTGAAATGCGTAGATATTAGGAGGAACACCAGTGGCGAAGGCGGCTTACTGGACGGTAACTGACGTTGAGGCTCGAAAGCGTGGGGAGCAAACAGG	Depleted		Firmicutes	Clostridia	Lachnospirales	Lachnospiraceae	NA	NA	bacterium
	5322567d7de1d94e6cf65390deb29b1c	ASV12	TACGTATGGAGCAAGCGTTATCCGGATTTACTGGGTGTAAAGGGAGTGTAGGTGGCCATGCAAGTCAGAAGTGAAAATCCGGGGCTCAACCCCGGAACTGCTTTTGAAACTGTGAGGCTAGAGTGCAGGAGGGGTGAGTGGAATTCCTAGTGTAGCGGTGAAATGCGTAGATATTAGGAGGAACACCAGTGGCGAAGGCGGCTCACTGGACTGTAACTGACACTGAGGCTCGAAAGCGTGGGGAGCAAACAGG	Depleted		Firmicutes	Clostridia	Lachnospirales	Lachnospiraceae	[Eubacterium] eligens group	NA	NA
	9e3226efaf559eb14a478f880462cb8a	ASV13	TACGTATGGTGCAAGCGTTATCCGGATTTACTGGGTGTAAAGGGAGCGTAGACGGAGTGGCAAGTCTGATGTGAAAACCCGGGGCTCAACCCCGGGACTGCATTGGAAACTGTCAATCTAGAGTACCGGAGAGGTAAGCGGAATTCCTAGTGTAGCGGTGAAATGCGTAGATATTAGGAGGAACACCAGTGGCGAAGGCGGCTTACTGGACGGTAACTGACGTTGAGGCTCGAAAGCGTGGGGAGCAAACAGG	Enriched	Negative interaction with zinc	Firmicutes	Clostridia	Lachnospirales	Lachnospiraceae	[Ruminococcus] torques group	NA	faecis/torques
	5fbc483f79cd97d3a7253931f37c33e8	ASV14	TACGTAGGTGGCAAGCGTTATCCGGATTTACTGGGTGTAAAGGGCGTGTAGGCGGGATTGCAAGTCAGATGTGAAAACTGGGGGCTCAACCTCCAGCCTGCATTTGAAACTGTAGTTCTTGAGTGCTGGAGAGGCAATCGGAATTCCGTGTGTAGCGGTGAAATGCGTAGATATACGGAGGAACACCAGTGGCGAAGGCGGATTGCTGGACAGTAACTGACGCTGAGGCGCGAAAGCGTGGGGAGCAAACAGG	Depleted		Firmicutes	Clostridia	Oscillospirales	Oscillospiraceae	Flavonifractor	NA	plautii
	5225de25bf8902d5a02c4af6e90cb5e8	ASV15	TACGTATGGAGCAAGCGTTATCCGGATTTACTGGGTGTAAAGGGAGCGTAGACGGTTGTGCAAGTCTGATGTGAAATTCCAGGGCTTAACCCTGGACCTGCATTGGAAACTGTATAACTAGAGTGTCGGAGAGGTGAGTGGAATTCCTAGTGTAGCGGTGAAATGCGTAGATATTAGGAGGAACACCAGTGGCGAAGGCGGCTCACTGGACGATAACTGACGTTGAGGCTCGAAAGCGTGGGGAGCAAACAGG	Enriched		Firmicutes	Clostridia	Lachnospirales	Lachnospiraceae	[Ruminococcus] gauvreauii group	NA	NA

## Sheet: TableS6
	Table S6: Metagenomic sequencing metadata.
	Sample ID	Paired ASA24 available	Patient ID	Timepoint	Read pairs pre-QC	Read pairs post-QC	Average genome size	Genome equivalents
	GO_Batch1_Blank_S438		NA	Blank	3750	2710	597000	1.1
	GO_Pt11_Baseline_S41		11	Baseline	19300000	19100000	3050000	1810
	GO_Pt11_C1D3_S11		11	C1D3	18400000	18100000	3200000	1610
	GO_Pt11_C1D7_S30		11	C1D7	26600000	26300000	3070000	2420
	GO_Pt11_C2D1_S17		11	C2D1	11500000	11400000	3370000	972
	GO_Pt12_Baseline_S66		12	Baseline	20000000	19800000	3320000	1710
	GO_Pt12_C1D1_S6	Yes	12	C1D1	15800000	15700000	3380000	1340
	GO_Pt12_C1D3_S18		12	C1D3	17200000	17000000	3420000	1430
	GO_Pt12_C1D7_S47		12	C1D7	28900000	28600000	3300000	2490
	GO_Pt12_C2D1_S182	Yes	12	C2D1	18200000	18000000	3060000	1750
	GO_Pt12_C2D1_S7		12	C2D1	3170000	3070000	3340000	254
	GO_Pt12_C3D1_S42	Yes	12	C3D1	20100000	19800000	2880000	1980
	GO_Pt13_Baseline_S61		13	Baseline	17700000	17500000	3070000	1650
	GO_Pt13_C1D1_S39	Yes	13	C1D1	18500000	18300000	2920000	1800
	GO_Pt13_C1D3_S5		13	C1D3	20400000	20300000	3010000	1950
	GO_Pt13_C1D7_S52		13	C1D7	22300000	22100000	3020000	2110
	GO_Pt13_C2D1_S34	Yes	13	C2D1	17400000	17200000	2930000	1680
	GO_Pt13_C3D1_S65	Yes	13	C3D1	17600000	17400000	2950000	1700
	GO_Pt14_Baseline_S418		14	Baseline	18800000	18600000	3420000	1600
	GO_Pt14_C1D1_S419	Yes	14	C1D1	23100000	22900000	2870000	2340
	GO_Pt14_C1D3_S416		14	C1D3	20000000	19900000	3100000	1880
	GO_Pt14_C2D1_S417	Yes	14	C2D1	18600000	18400000	3090000	1750
	GO_Pt14_C3D1_S415	Yes	14	C3D1	15900000	15700000	2910000	1590
	GO_Pt14_Final_S80		14	Final	30400000	30000000	3000000	3000
	GO_Pt15_Baseline_S37		15	Baseline	22700000	15600000	3450000	1300
	GO_Pt15_C1D1_S60		15	C1D1	21500000	21100000	3410000	1790
	GO_Pt15_C1D3_S2		15	C1D3	53000	21500	3670000	1.16
	GO_Pt15_C1D7_S51		15	C1D7	17500000	16100000	3750000	1230
	GO_Pt15_C2D1_S68	Yes	15	C2D1	16100000	10600000	3470000	880
	GO_Pt17_Baseline_S19		17	Baseline	17100000	16900000	3440000	1410
	GO_Pt17_C1D1_S26	Yes	17	C1D1	21600000	21300000	3350000	1820
	GO_Pt17_C1D7_S9		17	C1D7	19200000	18900000	3220000	1680
	GO_Pt17_C2D1_S3		17	C2D1	15900000	15800000	3320000	1370
	GO_Pt17_C3D1_S58		17	C3D1	50900000	50400000	3100000	4860
	GO_Pt17_Final_S99		17	Final	32000000	31800000	3430000	2780
	GO_Pt18_Baseline_S14		18	Baseline	25300000	25100000	4440000	1620
	GO_Pt18_C1D1_S33	Yes	18	C1D1	17800000	17600000	4340000	1160
	GO_Pt18_C1D3_S10		18	C1D3	26000000	25700000	3470000	2120
	GO_Pt18_C1D7_S38		18	C1D7	24200000	23900000	3740000	1820
	GO_Pt18_C2D1_S54	Yes	18	C2D1	22800000	22500000	3710000	1740
	GO_Pt18_C3D1_S420	Yes	18	C3D1	27200000	26900000	3220000	2450
	GO_Pt18_Final		18	Final	38300000	37900000	3620000	3110
	GO_Pt19_Baseline_S423		19	Baseline	22200000	21900000	3150000	2050
	GO_Pt19_C1D1_S421	Yes	19	C1D1	196000	110000	4420000	7.2
	GO_Pt19_C1D3_S424		19	C1D3	18400000	18300000	3010000	1780
	GO_Pt19_C1D7_S426		19	C1D7	19000000	18900000	3220000	1720
	GO_Pt19_C2D1_S422		19	C2D1	23400000	23200000	3250000	2100
	GO_Pt19_C3D1_S425		19	C3D1	17000000	16800000	3120000	1580
	GO_Pt1_Baseline_S46		1	Baseline	15600000	15400000	3840000	1150
	GO_Pt1_C1D1_S49	Yes	1	C1D1	18400000	18200000	3700000	1410
	GO_Pt1_C1D3_S44		1	C1D3	12600000	12500000	4060000	881
	GO_Pt1_C1D7_S181		1	C1D7	32400000	32100000	4430000	2170
	GO_Pt1_C1D7_S56		1	C1D7	4580000	4530000	4510000	290
	GO_Pt1_C2D1_S62	Yes	1	C2D1	17600000	17500000	3860000	1310
	GO_Pt1_C3D1	Yes	1	C3D1	46000000	45300000	4010000	3320
	GO_Pt1_Final		1	Final	23600000	23300000	3260000	2130
	GO_Pt20_Baseline_S431		20	Baseline	31400000	31100000	3330000	2740
	GO_Pt20_C1D1_S432	Yes	20	C1D1	20900000	20700000	3430000	1770
	GO_Pt20_C1D3_S430		20	C1D3	23400000	23200000	3380000	2010
	GO_Pt20_C1D7_S429		20	C1D7	19300000	19100000	3450000	1630
	GO_Pt20_C2D1_S427	Yes	20	C2D1	25100000	24900000	3700000	1970
	GO_Pt20_C3D1_S428		20	C3D1	26200000	25900000	3240000	2350
	GO_Pt21_Baseline_S436		21	Baseline	21400000	21200000	3110000	2000
	GO_Pt21_C1D1_S435	Yes	21	C1D1	22900000	22700000	3120000	2140
	GO_Pt21_C1D3_S434		21	C1D3	18100000	17800000	3060000	1710
	GO_Pt21_C1D7_S433		21	C1D7	23800000	23500000	3500000	1980
	GO_Pt22_Baseline_S142		22	Baseline	29500000	29300000	3510000	2490
	GO_Pt22_C1D1_S119	Yes	22	C1D1	42400000	42000000	3550000	3540
	GO_Pt22_C1D3_S186		22	C1D3	30700000	30500000	3880000	2350
	GO_Pt22_C1D7_S54		22	C1D7	33000000	32700000	3410000	2860
	GO_Pt23_Baseline_S112		23	Baseline	25200000	19600000	3390000	1740
	GO_Pt23_C1D1_S175	Yes	23	C1D1	37100000	33900000	3150000	3230
	GO_Pt23_C1D3_S63		23	C1D3	48800000	46500000	3380000	4030
	GO_Pt23_C1D7_S86		23	C1D7	15500000	14900000	3480000	1280
	GO_Pt23_C2D1_S133		23	C2D1	30200000	30000000	3450000	2580
	GO_Pt23_C3D1_S103		23	C3D1	24200000	23900000	3250000	2200
	GO_Pt24_Baseline_S183		24	Baseline	34400000	33000000	3160000	3100
	GO_Pt24_C1D1_S104		24	C1D1	17800000	17600000	3080000	1710
	GO_Pt25_Baseline_S59		25	Baseline	25000000	24700000	2680000	2760
	GO_Pt25_C1D1_S77	Yes	25	C1D1	47400000	47000000	2810000	5010
	GO_Pt25_C1D3_S126		25	C1D3	53300000	52800000	2830000	5590
	GO_Pt25_C2D1_S129	Yes	25	C2D1	46000000	45700000	2710000	5060
	GO_Pt25_C3D1_S71	Yes	25	C3D1	33500000	33200000	3080000	3230
	GO_Pt25_Final_S127	Yes	25	Final	46800000	46400000	2990000	4660
	GO_Pt29_Baseline_S130		29	Baseline	49600000	49100000	3090000	4760
	GO_Pt29_C1D1_S55	Yes	29	C1D1	35300000	35100000	2880000	3660
	GO_Pt29_C1D3_S125		29	C1D3	30700000	30400000	3670000	2480
	GO_Pt29_C2D1_S95	Yes	29	C2D1	33500000	33200000	3190000	3130
	GO_Pt29_C3D1_S131		29	C3D1	21400000	21100000	3050000	2080
	GO_Pt2_Baseline_S32		2	Baseline	13300000	13000000	3350000	1080
	GO_Pt2_C1D1_S35	Yes	2	C1D1	23500000	23200000	3290000	2020
	GO_Pt2_C1D3_S53		2	C1D3	15700000	15500000	2730000	1640
	GO_Pt2_C1D7_S55		2	C1D7	21100000	20800000	2660000	2200
	GO_Pt2_C2D1_S58	Yes	2	C2D1	16800000	16600000	2370000	2020
	GO_Pt2_C3D1_S12	Yes	2	C3D1	16900000	16700000	3250000	1480
	GO_Pt30_Baseline_S67		30	Baseline	38000000	37500000	3010000	3740
	GO_Pt30_C1D1_S176		30	C1D1	34200000	33700000	2890000	3490
	GO_Pt30_C1D3_S87		30	C1D3	28200000	26400000	2960000	2670
	GO_Pt30_C3D1_S101		30	C3D1	22900000	22600000	2940000	2300
	GO_Pt31_Baseline_S171		31	Baseline	19000000	18700000	3180000	1730
	GO_Pt31_C1D1_S68	Yes	31	C1D1	41000000	40700000	3320000	3680
	GO_Pt31_C1D3_S72		31	C1D3	47900000	47600000	2930000	4830
	GO_Pt31_C1D7_S120		31	C1D7	33300000	33000000	2850000	3460
	GO_Pt31_C2D1_S155	Yes	31	C2D1	39500000	39100000	3080000	3810
	GO_Pt31_C3D1_S134	Yes	31	C3D1	37400000	36500000	2960000	3660
	GO_Pt31_Final_S139	Yes	31	Final	25900000	25200000	2920000	2590
	GO_Pt32_Baseline_S88		32	Baseline	30500000	30300000	3460000	2610
	GO_Pt32_C1D1_S78	Yes	32	C1D1	23000000	22700000	3330000	2030
	GO_Pt32_C1D3_S135		32	C1D3	24800000	24500000	3410000	2160
	GO_Pt32_C1D7_S113		32	C1D7	27400000	24600000	3660000	2000
	GO_Pt32_C2D1_S64	Yes	32	C2D1	25400000	25200000	3390000	2220
	GO_Pt33_Baseline_S144		33	Baseline	45100000	44600000	4160000	3210
	GO_Pt33_C1D1_S75		33	C1D1	47100000	46600000	3620000	3850
	GO_Pt33_C1D3_S105		33	C1D3	22900000	22400000	4160000	1610
	GO_Pt33_C1D7_S191		33	C1D7	26900000	26600000	3960000	2000
	GO_Pt33_C2D1_S145	Yes	33	C2D1	33300000	33000000	3930000	2510
	GO_Pt33_Final_S60		33	Final	33500000	33300000	4120000	2410
	GO_Pt34_Baseline_S146		34	Baseline	24800000	24700000	4210000	1750
	GO_Pt34_C1D1_S73	Yes	34	C1D1	31200000	31000000	4420000	2100
	GO_Pt34_C1D3_S89		34	C1D3	38600000	38300000	4790000	2370
	GO_Pt35_Baseline_S128		35	Baseline	37800000	37400000	4550000	2460
	GO_Pt35_C1D1_S147	Yes	35	C1D1	31800000	31500000	4870000	1940
	GO_Pt35_C1D3_S53		35	C1D3	39700000	39400000	4490000	2620
	GO_Pt35_C1D7_S92		35	C1D7	43700000	43300000	4370000	2960
	GO_Pt35_C2D1_S61	Yes	35	C2D1	49800000	49500000	3600000	4110
	GO_Pt35_C3D1_S148		35	C3D1	55100000	54300000	3960000	4110
	GO_Pt35_Final_S114		35	Final	13500000	13300000	3790000	1050
	GO_Pt38_Baseline_S62		38	Baseline	46700000	46300000	3410000	4050
	GO_Pt38_C1D1_S143	Yes	38	C1D1	49600000	49000000	3300000	4440
	GO_Pt38_C1D3_S81		38	C1D3	29400000	29200000	3180000	2760
	GO_Pt38_C1D7_S115		38	C1D7	28300000	28000000	3170000	2650
	GO_Pt38_C2D1_S116	Yes	38	C2D1	34800000	34500000	3150000	3280
	GO_Pt38_C3D1_S189	Yes	38	C3D1	49400000	49000000	2990000	4910
	GO_Pt38_Final_S98	Yes	38	Final	11800000	11700000	3160000	1110
	GO_Pt39_Baseline_S123		39	Baseline	26500000	26300000	2710000	2920
	GO_Pt40_Baseline_S184		40	Baseline	26600000	26400000	3490000	2260
	GO_Pt40_C1D3_S106		40	C1D3	20600000	20400000	3020000	2020
	GO_Pt40_C1D7_S82		40	C1D7	28600000	27200000	3040000	2680
	GO_Pt40_C2D1		40	C2D1	34800000	33600000	3100000	3210
	GO_Pt42_Baseline_S121		42	Baseline	7480000	7220000	3150000	674
	GO_Pt42_C1D1_S69	Yes	42	C1D1	20200000	19900000	3340000	1790
	GO_Pt42_C1D3_S79		42	C1D3	25100000	21700000	3230000	2010
	GO_Pt42_C1D7_S177		42	C1D7	17600000	17400000	3490000	1500
	GO_Pt42_C2D1_S74	Yes	42	C2D1	38100000	32100000	3270000	2930
	GO_Pt42_C3D1_S140	Yes	42	C3D1	23800000	6180000	3630000	511
	GO_Pt42_Final_S90	Yes	42	Final	26400000	26300000	3460000	2270
	GO_Pt43_Baseline_S117		43	Baseline	25900000	25400000	3980000	1920
	GO_Pt43_C1D1_S65	Yes	43	C1D1	46600000	46000000	3900000	3440
	GO_Pt43_C1D3_S96		43	C1D3	28400000	28200000	3930000	2150
	GO_Pt43_C1D7_S178		43	C1D7	34300000	34000000	4070000	2500
	GO_Pt43_C2D1_S56	Yes	43	C2D1	24900000	24600000	4050000	1830
	GO_Pt43_C3D1_S132	Yes	43	C3D1	43200000	42700000	3680000	3480
	GO_Pt43_Final_S192	Yes	43	Final	26300000	26000000	3730000	2080
	GO_Pt44_Baseline_S70		44	Baseline	40700000	25700000	2960000	2610
	GO_Pt44_C1D1_S94	Yes	44	C1D1	20400000	5030000	3200000	469
	GO_Pt44_C1D3_S57		44	C1D3	6960000	5100000	3240000	469
	GO_Pt44_C1D7_S83		44	C1D7	23200000	20600000	2900000	2130
	GO_Pt44_C2D1_S107		44	C2D1	22800000	22600000	3170000	2130
	GO_Pt45_Baseline_S108		45	Baseline	24200000	23900000	3090000	2310
	GO_Pt45_C1D1_S173	Yes	45	C1D1	34000000	33800000	3020000	3360
	GO_Pt45_C1D3_S91		45	C1D3	17500000	17300000	3420000	1510
	GO_Pt45_C1D7_S66		45	C1D7	27800000	27500000	3290000	2500
	GO_Pt45_C2D1_S137	Yes	45	C2D1	26500000	26200000	3350000	2330
	GO_Pt45_C3D1_S109	Yes	45	C3D1	24800000	24400000	3310000	2200
	GO_Pt45_Final_S136	Yes	45	Final	10200000	10200000	3290000	922
	GO_Pt47_Baseline_S124		47	Baseline	28100000	27900000	3270000	2560
	GO_Pt47_C1D1_S141	Yes	47	C1D1	27100000	26900000	3470000	2330
	GO_Pt47_C1D3_S84		47	C1D3	31600000	31400000	3620000	2590
	GO_Pt47_C1D7_S167		47	C1D7	40100000	39800000	3820000	3120
	GO_Pt47_C2D1_S118	Yes	47	C2D1	27200000	26900000	3620000	2210
	GO_Pt4_Baseline_S21		4	Baseline	18800000	18600000	3880000	1380
	GO_Pt4_C1D1_S28	Yes	4	C1D1	22800000	22600000	3730000	1740
	GO_Pt4_C1D3_S4		4	C1D3	11600000	11500000	3290000	1010
	GO_Pt4_C1D7		4	C1D7	25800000	25600000	3720000	2040
	GO_Pt4_C2D1_S40	Yes	4	C2D1	19500000	19300000	4030000	1380
	GO_Pt4_C3D1_S43	Yes	4	C3D1	15700000	15500000	4010000	1110
	GO_Pt50_Baseline_S168		50	Baseline	48100000	47500000	3110000	4530
	GO_Pt50_C1D1_S110	Yes	50	C1D1	34200000	33800000	3030000	3330
	GO_Pt50_C1D3_S138		50	C1D3	32500000	32200000	3050000	3150
	GO_Pt50_C1D7_S85		50	C1D7	11600000	11500000	3040000	1120
	GO_Pt50_C2D1_S152	Yes	50	C2D1	28400000	28100000	3040000	2770
	GO_Pt50_C3D1_S111	Yes	50	C3D1	28100000	27500000	2960000	2780
	GO_Pt50_Final_S153	Yes	50	Final	23900000	23300000	2920000	2380
	GO_Pt51_Baseline		51	Baseline	54100000	53400000	3340000	4660
	GO_Pt51_C1D1	Yes	51	C1D1	18200000	17900000	3370000	1510
	GO_Pt51_C1D3		51	C1D3	43900000	43600000	3360000	3850
	GO_Pt51_C1D7		51	C1D7	21400000	21100000	3320000	1880
	GO_Pt51_C2D1	Yes	51	C2D1	9290000	9140000	3190000	851
	GO_Pt51_C3D1	Yes	51	C3D1	23500000	23300000	3710000	1840
	GO_Pt51_Final		51	Final	26600000	26200000	3310000	2350
	GO_Pt52_Baseline		52	Baseline	33600000	33200000	3270000	3030
	GO_Pt52_C1D1	Yes	52	C1D1	32400000	31900000	3510000	2670
	GO_Pt52_C1D3		52	C1D3	44500000	43800000	3630000	3470
	GO_Pt52_C1D7		52	C1D7	41000000	40500000	3130000	3810
	GO_Pt52_C2D1	Yes	52	C2D1	24300000	23800000	3330000	2110
	GO_Pt52_C3D1	Yes	52	C3D1	28800000	28400000	2730000	3040
	GO_Pt52_Final		52	Final	26100000	25800000	3290000	2310
	GO_Pt53_Baseline		53	Baseline	31600000	31200000	3240000	2830
	GO_Pt53_C1D1	Yes	53	C1D1	31600000	31100000	3400000	2620
	GO_Pt53_C1D3		53	C1D3	9230000	9070000	3320000	807
	GO_Pt53_C1D7		53	C1D7	30400000	30200000	3890000	2310
	GO_Pt53_C2D1		53	C2D1	23600000	23200000	4150000	1660
	GO_Pt54_Baseline		54	Baseline	9370000	9170000	3440000	791
	GO_Pt54_C1D1	Yes	54	C1D1	37100000	36500000	3630000	2910
	GO_Pt54_C1D3		54	C1D3	20400000	20000000	3740000	1590
	GO_Pt54_C1D7		54	C1D7	14300000	13900000	3620000	1140
	GO_Pt54_C2D1	Yes	54	C2D1	39300000	38600000	2950000	3850
	GO_Pt54_C3D1	Yes	54	C3D1	12700000	12700000	2870000	1300
	GO_Pt54_Final	Yes	54	Final	29900000	29500000	2930000	2920
	GO_Pt6_C1D1_S48		6	C1D1	26600000	26300000	3450000	2180
	GO_Pt6_C1D3_S24		6	C1D3	20800000	20600000	3780000	1570
	GO_Pt6_C1D7_S31		6	C1D7	27400000	26800000	3640000	2020
	GO_Pt6_C2D1_S13	Yes	6	C2D1	26800000	26500000	3740000	2040
	GO_Pt6_C3D1_S64	Yes	6	C3D1	16400000	16300000	3510000	1330
	GO_Pt7_Baseline_S50		7	Baseline	17700000	17500000	4200000	1200
	GO_Pt7_C1D1_S1	Yes	7	C1D1	11900000	11700000	3140000	1070
	GO_Pt7_C1D3_S57		7	C1D3	9540000	9420000	3650000	743
	GO_Pt7_C1D7_S67		7	C1D7	23500000	23200000	3700000	1800
	GO_Pt7_C2D1_S29	Yes	7	C2D1	12500000	12400000	3270000	1080
	GO_Pt9b_Baseline_S179		9	Baseline	41100000	40700000	3240000	3780
	GO_Pt9b_C1D1_S187	Yes	9	C1D1	34300000	22400000	3320000	2020
	GO_Pt9b_C1D3_S180		9	C1D3	41800000	41200000	3250000	3770
	GO_Pt9b_C2D1_S174	Yes	9	C2D1	37600000	37000000	3240000	3430
	GO_Pt9b_C3D1_S188	Yes	9	C3D1	24600000	24200000	3150000	2290

## Sheet: TableS7
	Table S7: Significant copper-gene family interactions.
	Gene (KEGG Ortholog)	Interaction Strength (Rho)	p value	False discovery rate (FDR)
	K00868	0.636965	8.62992e-07	0.0037031
	K08968	-0.593326	8.8151e-06	0.0135048
	K01955	0.576142	1.47868e-05	0.0135048
	K01560	0.583213	1.69189e-05	0.0135048
	K04769	0.571071	1.82724e-05	0.0135048
	K03660	0.602807	1.88834e-05	0.0135048
	K07284	0.561268	2.72431e-05	0.0167
	K01990	0.550655	4.13963e-05	0.0207449
	K03924	0.545011	5.14186e-05	0.0207449
	K06395	0.554957	5.159e-05	0.0207449
	K01738	0.544064	5.33037e-05	0.0207449
	K06378	0.538393	6.59766e-05	0.0207449
	K01880	0.537919	6.71516e-05	0.0207449
	K03437	0.537707	6.76833e-05	0.0207449
	K02469	0.532781	8.1177e-05	0.023222
	K02035	0.528724	9.40943e-05	0.024659
	K02912	0.872932	9.80701e-05	0.024659
	K19265	0.526094	0.00010344	0.024659
	K03657	0.519694	0.000129833	0.0282878
	K00169	0.517937	0.000138078	0.0282878
	K03686	0.517863	0.000138439	0.0282878
	K02924	0.899553	0.000163108	0.03045
	K03100	0.513118	0.000163214	0.03045
	K01653	0.511206	0.00017429	0.0311615
	K03091	0.50824	0.000192827	0.0327568
	K02108	0.507345	0.000198767	0.0327568
	K01940	0.505901	0.000208695	0.0327568
	K01673	0.504521	0.000218602	0.0327568
	K00700	0.502837	0.000231271	0.0327568
	K03741	0.512319	0.000231952	0.0327568
	K07814	0.501584	0.000241125	0.0327568
	K00965	0.500549	0.000249549	0.0327568
	K02003	0.499463	0.000258676	0.0327568
	K09762	0.499361	0.000259551	0.0327568
	K06379	0.495018	0.000299276	0.0350212
	K03086	0.494607	0.000303307	0.0350212
	K06385	0.493562	0.000313778	0.0350212
	K02343	0.493139	0.000318107	0.0350212
	K06442	0.492911	0.000320461	0.0350212
	K03704	0.492338	0.000326462	0.0350212
	K06958	0.491442	0.000336034	0.0351688
	K09013	0.490316	0.000348427	0.0355977
	K06399	0.489181	0.000361337	0.0360581
	K07991	0.876433	0.00040024	0.0385863
	K07979	0.485145	0.000410816	0.0385863
	K03702	0.484927	0.000413649	0.0385863
	K01992	0.483553	0.000431966	0.0394375
	K06405	0.482511	0.000446329	0.0398999
	K03524	0.481129	0.000466044	0.0408121
	K06390	0.478232	0.000509963	0.0429338
	K02029	0.476811	0.000532836	0.0429338
	K01462	0.476657	0.000535378	0.0429338
	K03695	0.476575	0.000536723	0.0429338
	K21071	0.475775	0.000550086	0.0429338
	K03786	0.475762	0.000550304	0.0429338
	K10773	0.473245	0.000594372	0.0437683
	K00858	0.473145	0.000596176	0.0437683
	K05601	0.473013	0.00059859	0.0437683
	K09772	0.472837	0.000601801	0.0437683
	K04485	0.471718	0.000622609	0.0440622
	K03106	0.47034	0.000649137	0.0440622
	K15770	0.484215	0.000650355	0.0440622
	K01677	0.469972	0.000656396	0.0440622
	K03320	0.469027	0.00067535	0.0440622
	K06997	0.468997	0.000675971	0.0440622
	K06960	0.46824	0.000691529	0.0440622
	K00384	0.468203	0.000692287	0.0440622
	K01534	0.467617	0.000704561	0.0440622
	K10441	0.46743	0.000708528	0.0440622
	K00003	0.466924	0.00071933	0.0440949
	K06393	0.465364	0.000753594	0.0450785
	K04487	0.464833	0.00076558	0.0450785
	K03431	0.464776	0.000766891	0.0450785
	K15772	0.463576	0.000794664	0.0453013
	K06987	0.467891	0.000798208	0.0453013
	K00949	0.462928	0.000810049	0.0453013
	K09157	0.462551	0.00081911	0.0453013
	K11991	0.461654	0.000841034	0.0453013
	K02836	0.461479	0.000845373	0.0453013
	K00266	0.461442	0.000846303	0.0453013
	K03189	0.470118	0.000855141	0.0453013
	K00869	-0.785479	0.00087063	0.0455594
	K01939	0.456023	0.000991232	0.0510725
	K00549	0.455726	0.000999789	0.0510725
	K02864	0.454608	0.00103255	0.0521257
	K06394	0.45406	0.00104897	0.0523389
	K07636	0.453459	0.00106725	0.0526389
	K03077	0.452499	0.00109702	0.0529088
	K02027	0.452487	0.00109739	0.0529088
	K06381	0.451981	0.00111339	0.0530838
	K01182	0.451346	0.00113377	0.0534614
	K01588	0.450369	0.00116575	0.0543723
	K02028	0.447865	0.00125149	0.0564677
	K00688	0.447404	0.00126785	0.0564677
	K01193	0.447329	0.00127054	0.0564677
	K00849	0.44696	0.0012838	0.0564677
	K00761	0.446832	0.00128844	0.0564677
	K05916	-0.586941	0.00128964	0.0564677
	K04334	-0.606132	0.00132009	0.0572173
	K02051	0.445512	0.00133711	0.0573754
	K06406	0.444899	0.00136026	0.0577907
	K03424	0.443043	0.00143254	0.0586535
	K01649	0.442971	0.0014354	0.0586535
	K00975	0.442855	0.00144004	0.0586535
	K03919	-0.691474	0.00148019	0.0586535
	K06382	0.441636	0.0014896	0.0586535
	K00088	0.441073	0.00151299	0.0586535
	K06334	0.441055	0.00151375	0.0586535
	K02647	0.440925	0.0015192	0.0586535
	K07462	0.440746	0.00152674	0.0586535
	K06392	0.440726	0.00152758	0.0586535
	K03776	-0.57923	0.00154604	0.0586535
	K01493	0.440122	0.00155326	0.0586535
	K01867	0.440005	0.00155826	0.0586535
	K02386	-0.586644	0.00163268	0.0605115
	K07042	0.43792	0.00165015	0.0605115
	K01439	0.437631	0.00166326	0.0605115
	K07580	0.827588	0.00166403	0.0605115
	K00074	0.437294	0.00167867	0.0605307
	K08303	0.435202	0.00177719	0.0635493
	K02794	0.434313	0.00182057	0.0645625
	K06164	-0.507654	0.00185229	0.065149
	K03232	0.822574	0.00187871	0.0655409
	K05966	-0.52777	0.00190697	0.0659146
	K06391	0.432116	0.00193184	0.0659146
	K02050	0.43204	0.0019358	0.0659146
	K07816	0.431752	0.00195086	0.0659146
	K03789	0.430546	0.00201506	0.0675518
	K06923	0.428623	0.00212129	0.0705617
	K02056	0.428199	0.00214533	0.0706627
	K01835	0.427816	0.0021673	0.0706627
	K02057	0.427144	0.0022063	0.0706627
	K07301	0.426845	0.00222386	0.0706627
	K07444	0.426837	0.00222432	0.0706627
	K06147	0.426761	0.0022288	0.0706627
	K00836	0.544894	0.00223964	0.0706627
	K01243	0.426302	0.00225607	0.0706627
	K02026	0.425944	0.00227753	0.0708179
	K07166	0.425345	0.00231383	0.0714291
	K02501	0.424721	0.00235219	0.0720947
	K01537	0.423968	0.00239921	0.072285
	K01624	0.423677	0.00241761	0.072285
	K01448	0.423658	0.00241885	0.072285
	K00077	0.423549	0.00242578	0.072285
	K04488	0.423243	0.0024453	0.0723641
	K01933	0.422637	0.00248444	0.0724492
	K02227	0.422488	0.00249409	0.0724492
	K11928	0.422416	0.00249883	0.0724492
	K07258	0.42169	0.00254664	0.0730395
	K01854	0.421591	0.00255323	0.0730395
	K18890	-0.514239	0.00260488	0.0740233
	K01567	0.419741	0.00267905	0.0756236
	K18349	0.419338	0.00270719	0.0756236
	K02793	0.41919	0.00271761	0.0756236
	K06131	0.41899	0.00273169	0.0756236
	K02040	0.418388	0.00277454	0.0759871
	K10947	0.417861	0.00281254	0.0759871
	K02688	-0.593659	0.0028232	0.0759871
	K06396	0.41758	0.00283301	0.0759871
	K03110	0.41744	0.00284326	0.0759871
	K07478	0.417333	0.00285107	0.0759871
	K12299	-0.551286	0.0028779	0.0762288
	K07699	0.415262	0.00300678	0.0788171
	K00951	0.415142	0.00301603	0.0788171
	K04072	0.414937	0.00303184	0.0788171
	K10254	0.414535	0.00306314	0.0788171
	K12132	0.414395	0.00307412	0.0788171
	K22278	0.414246	0.00308583	0.0788171
	K02768	0.413733	0.00312642	0.0790032
	K01776	0.413689	0.00312993	0.0790032
	K01817	0.413015	0.00318406	0.0796784
	K13542	0.416991	0.00319382	0.0796784
	K00075	0.412559	0.00322114	0.0798955
	K06346	0.41201	0.00326636	0.0802767
	K13895	-0.564682	0.00327393	0.0802767
	K14260	0.411688	0.00329307	0.0802872
	K02434	0.410966	0.00335375	0.0810286
	K10119	0.410878	0.00336124	0.0810286
	K01783	0.410499	0.00339348	0.0810889
	K00428	-0.517526	0.00340154	0.0810889
	K02237	0.409897	0.00344541	0.081681
	K02372	0.409634	0.00346825	0.0817707
	K01889	0.408322	0.00358441	0.0840476
	K06024	0.407665	0.00364388	0.0849776
	K01512	0.407331	0.00367445	0.0850004
	K00878	0.406952	0.00370936	0.0850004
	K07229	-0.603853	0.00374712	0.0850004
	K02111	0.406545	0.00374726	0.0850004
	K15372	0.453226	0.00376138	0.0850004
	K03569	0.406214	0.00377824	0.0850004
	K02892	0.406087	0.0037902	0.0850004
	K03529	0.405948	0.00380333	0.0850004
	K02769	0.405712	0.00382574	0.0850583
	K06214	-0.536862	0.00388619	0.0859568
	K11358	0.404435	0.00394894	0.086897
	K03574	0.403997	0.00399196	0.0873953
	K03394	0.403194	0.00407194	0.0877686
	K07811	-0.599415	0.00408132	0.0877686
	K03696	0.402591	0.00413292	0.0877686
	K04075	0.402509	0.0041413	0.0877686
	K06383	0.402039	0.00418949	0.0877686
	K06407	0.401932	0.0042005	0.0877686
	K01207	0.40165	0.0042297	0.0877686
	K00995	0.40142	0.00425362	0.0877686
	K13288	0.409515	0.00425756	0.0877686
	K06959	0.40138	0.00425783	0.0877686
	K02038	0.401134	0.00428358	0.0877686
	K08154	-0.56171	0.00428554	0.0877686
	K01150	-0.551186	0.00429348	0.0877686
	K10117	0.401022	0.00429536	0.0877686
	K00845	0.400741	0.00432509	0.0879572
	K01881	0.400327	0.00436911	0.0884332
	K00163	-0.463036	0.00445784	0.0898057
	K04042	0.399137	0.00449799	0.0901911
	K03499	0.397604	0.00466886	0.0919267
	K08326	-0.619492	0.00467354	0.0919267
	K00702	0.405524	0.00468572	0.0919267
	K07309	-0.509816	0.0047262	0.0919267
	K16346	-0.536143	0.0047537	0.0919267
	K03612	0.396725	0.00476929	0.0919267
	K12510	0.396691	0.00477328	0.0919267
	K01890	0.396583	0.00478578	0.0919267
	K02926	0.396561	0.00478829	0.0919267
	K01628	0.3963	0.00481863	0.0919267
	K01194	-0.493032	0.00483099	0.0919267
	K08681	0.396103	0.00484163	0.0919267
	K03436	0.395687	0.00489046	0.0924447
	K03737	0.394758	0.00500117	0.0941229
	K03767	0.394216	0.00506674	0.0949406
	K03523	0.393823	0.0051148	0.0954244
	K06398	0.393427	0.00516357	0.0955158
	K00655	0.393359	0.00517196	0.0955158
	K02601	0.393227	0.00518835	0.0955158
	K15598	0.40106	0.00520874	0.0955158
	K07667	0.392156	0.00532284	0.0963527
	K03308	0.392073	0.00533342	0.0963527
	K04517	0.392071	0.00533373	0.0963527
	K02871	0.391989	0.0053442	0.0963527
	K01929	0.391638	0.00538911	0.096756
	K01945	0.390701	0.00551054	0.0985239
	K08384	0.39001	0.00560169	0.0994081
	K03487	-0.569892	0.00562455	0.0994081
	K00010	0.389799	0.00562982	0.0994081
	K07803	-0.547022	0.00567005	0.0994081
	K07088	0.389186	0.00571219	0.0994081
	K02965	0.389154	0.00571641	0.0994081
	K01950	0.389112	0.00572216	0.0994081
	K02119	0.388846	0.00575818	0.0996039
	K18220	0.388687	0.00577986	0.0996039
	K07254	0.766762	0.00589947	0.100445
	K09934	-0.621442	0.00590563	0.100445
	K12143	-0.621371	0.00591296	0.100445
	K02039	0.387546	0.00593751	0.100445
	K20490	0.387488	0.00594569	0.100445
	K07069	0.543237	0.00608202	0.102334
	K00319	0.764453	0.00614465	0.102334
	K11780	0.764453	0.00614465	0.102334
	K10026	0.386029	0.00615293	0.102334
	K01356	0.385637	0.00620956	0.102477
	K03438	0.385529	0.00622528	0.102477
	K14656	0.763636	0.00623313	0.102477
	K01647	0.38526	0.00626459	0.102525
	K03058	0.792053	0.00631095	0.102525
	K01961	0.384828	0.0063282	0.102525
	K07645	-0.530829	0.00633167	0.102525
	K03120	0.761468	0.00647249	0.104411
	K13789	0.383332	0.00655256	0.10458
	K06403	0.382928	0.00661439	0.10458
	K20459	0.630448	0.00666603	0.10458
	K01129	0.382521	0.00667704	0.10458
	K01956	0.382267	0.00671646	0.10458
	K21903	0.382222	0.00672348	0.10458
	K03047	0.759174	0.00673299	0.10458
	K00278	0.382097	0.00674296	0.10458
	K07738	0.382037	0.00675232	0.10458
	K00180	0.381931	0.00676904	0.10458
	K07005	0.38193	0.00676918	0.10458
	K02122	0.38189	0.00677537	0.10458
	K00795	-0.499452	0.00681112	0.104755
	K06397	0.381141	0.00689373	0.104926
	K02470	0.38101	0.00691467	0.104926
	K03925	0.380774	0.00695242	0.104926
	K07154	0.380764	0.00695398	0.104926
	K10124	-0.582926	0.00698661	0.104926
	K03044	0.756881	0.0070011	0.104926
	K10118	0.380429	0.00700782	0.104926
	K09765	0.380367	0.00701788	0.104926
	K02528	0.379869	0.00709876	0.105767
	K06215	0.379068	0.00723059	0.107304
	K22132	0.378923	0.00725477	0.107304
	K19665	0.754587	0.00727695	0.107304
	K01104	0.377744	0.00745323	0.109527
	K07172	-0.494103	0.00752995	0.109828
	K08600	0.37719	0.00754801	0.109828
	K03687	0.377176	0.00755052	0.109828
	K03892	0.376986	0.0075832	0.109931
	K01069	0.376706	0.00763174	0.110143
	K01006	0.376606	0.00764919	0.110143
	K07720	0.376112	0.00773576	0.110961
	K07248	-0.519669	0.00775772	0.110961
	K00057	0.37561	0.00782443	0.111452
	K07502	0.375105	0.00791453	0.111452
	K01740	0.374971	0.00793863	0.111452
	K07011	-0.508836	0.00794058	0.111452
	K10006	0.390781	0.00795144	0.111452
	K03565	0.374872	0.00795644	0.111452
	K02939	0.374754	0.00797779	0.111452
	K00948	0.374518	0.00802057	0.111452
	K04759	0.374489	0.0080258	0.111452
	K03477	-0.517448	0.00807125	0.111722
	K02058	0.373962	0.00812193	0.112062
	K06012	0.373208	0.00826133	0.113395
	K03703	0.373154	0.00827141	0.113395
	K06165	-0.525744	0.0083258	0.113644
	K12574	0.372643	0.00836714	0.113644
	K04074	0.37627	0.00839377	0.113644
	K02114	0.372493	0.00839548	0.113644
	K03629	0.37158	0.00856947	0.115353
	K02879	0.371516	0.00858168	0.115353
	K03322	0.37109	0.00866408	0.115353
	K03324	0.371085	0.00866505	0.115353
	K02984	0.743667	0.00870062	0.115353
	K17488	0.743667	0.00870062	0.115353
	K02834	0.370854	0.00870994	0.115353
	K01586	0.370505	0.00877825	0.1159
	K10112	0.369846	0.00890831	0.117256
	K07133	0.369612	0.00895489	0.117472
	K07729	0.369464	0.00898466	0.117472
	K00773	0.369353	0.00900681	0.117472
	K11392	-0.447085	0.00909304	0.117803
	K15904	0.740826	0.00910206	0.117803
	K02030	0.368792	0.00911993	0.117803
	K10537	-0.59535	0.00914205	0.117803
	K12262	-0.500515	0.00920983	0.118321
	K00805	0.367953	0.00929151	0.118565
	K15986	0.367952	0.00929181	0.118565
	K09124	0.392062	0.00931728	0.118565
	K03816	0.367722	0.00933931	0.118565
	K01962	0.367456	0.00939439	0.118629
	K06023	0.367431	0.00939961	0.118629
	K12257	0.366949	0.0095006	0.119353
	K03613	0.366887	0.00951347	0.119353
	K13940	0.366672	0.00955892	0.119353
	K03491	-0.528246	0.00956825	0.119353
	K00982	0.457437	0.00967203	0.120298
	K07718	0.365899	0.00972333	0.120492
	K06969	0.365727	0.00976027	0.120492
	K02033	0.36548	0.00981345	0.120492
	K02909	0.365457	0.00981844	0.120492
	K01733	0.365005	0.00991671	0.120492
	K00705	0.364849	0.00995064	0.120492
	K01523	0.364744	0.00997368	0.120492
	K01308	0.368418	0.0099799	0.120492
	K08996	-0.435764	0.00999308	0.120492
	K00954	0.364605	0.0100042	0.120492
	K04801	0.734429	0.0100551	0.120492
	K07728	0.734429	0.0100551	0.120492
	K01515	0.364129	0.0101093	0.120492
	K03596	0.364101	0.0101155	0.120492
	K14170	0.363866	0.0101676	0.120492
	K07015	0.363864	0.0101681	0.120492
	K07674	-0.560215	0.0101987	0.120492
	K21600	0.363662	0.0102132	0.120492
	K01190	0.363462	0.010258	0.120492
	K06042	0.367154	0.010258	0.120492
	K03496	0.363376	0.0102773	0.120492
	K07043	0.363151	0.0103281	0.120736
	K00394	0.382682	0.0103544	0.120736
	K04029	0.362438	0.0104901	0.121987
	K18779	0.731425	0.0105268	0.122082
	K07001	0.362106	0.0105665	0.122212
	K02908	0.703185	0.0107363	0.123843
	K11737	-0.466379	0.0107669	0.12385
	K02120	0.361004	0.0108228	0.12385
	K07030	0.360912	0.0108445	0.12385
	K03366	0.376175	0.0108729	0.12385
	K10004	-0.543502	0.0108812	0.12385
	K14052	-0.728931	0.0109304	0.124045
	K01887	0.36044	0.0109562	0.124045
	K00620	0.35999	0.0110635	0.124529
	K00526	0.359907	0.0110833	0.124529
	K02878	0.359896	0.011086	0.124529
	K15924	0.700709	0.0111398	0.124807
	K02335	0.359508	0.0111795	0.124925
	K03685	0.359066	0.0112867	0.125795
	K02036	0.358843	0.0113411	0.126072
	K07139	0.358724	0.0113703	0.126072
	K02952	0.358448	0.0114381	0.126109
	K04763	0.358323	0.0114689	0.126109
	K04758	0.358287	0.0114779	0.126109
	K11071	0.35812	0.0115194	0.126109
	K03540	0.725402	0.0115206	0.126109
	K03643	-0.496432	0.0115978	0.126631
	K10108	-0.551869	0.0116443	0.126816
	K11189	0.357066	0.0117832	0.127239
	K09779	0.357057	0.0117855	0.127239
	K02600	0.35701	0.0117975	0.127239
	K03111	0.356993	0.0118017	0.127239
	K10907	0.356792	0.0118526	0.127258
	K03780	-0.399006	0.0118628	0.127258
	K01338	0.356597	0.0119024	0.127365
	K01870	0.356406	0.0119513	0.12757
	K02123	0.356265	0.0119874	0.127638
	K18140	-0.525392	0.0120386	0.127865
	K00673	-0.503378	0.0121572	0.128806
	K03547	0.355446	0.0121991	0.128896
	K02118	0.355344	0.0122258	0.128896
	K11183	-0.474771	0.0123371	0.129751
	K02902	0.35461	0.0124187	0.129871
	K20492	0.354593	0.0124231	0.129871
	K06901	0.354532	0.0124393	0.129871
	K03310	0.354346	0.0124886	0.130069
	K03536	0.353673	0.0126686	0.130833
	K05366	0.353583	0.0126929	0.130833
	K02224	0.35353	0.012707	0.130833
	K00363	-0.481342	0.0127894	0.130833
	K14540	0.353034	0.0128415	0.130833
	K00198	0.352946	0.0128656	0.130833
	K04771	0.352743	0.0129211	0.130833
	K06919	0.352636	0.0129503	0.130833
	K02890	0.352468	0.0129965	0.130833
	K03719	0.352412	0.0130118	0.130833
	K02529	0.352253	0.0130558	0.130833
	K11202	-0.371374	0.0130656	0.130833
	K02803	0.363316	0.0130731	0.130833
	K02874	0.352146	0.0130852	0.130833
	K07171	0.352125	0.013091	0.130833
	K07124	0.35205	0.0131118	0.130833
	K02948	0.35181	0.0131786	0.130833
	K06281	-0.508679	0.013188	0.130833
	K07103	0.715953	0.0132144	0.130833
	K15771	0.362735	0.0132303	0.130833
	K03215	0.351416	0.0132885	0.130833
	K03167	0.688505	0.013295	0.130833
	K03224	-0.426585	0.0132997	0.130833
	K01058	-0.374655	0.0133132	0.130833
	K01704	0.351289	0.0133242	0.130833
	K19302	0.351003	0.0134047	0.131323
	K07473	0.350712	0.0134873	0.131652
	K03824	-0.446005	0.0134996	0.131652
	K04486	0.350006	0.0136888	0.13293
	K13012	0.373246	0.0136926	0.13293
	K00757	0.349678	0.0137835	0.133262
	K07712	-0.476795	0.013789	0.133262
	K06333	0.349361	0.0138754	0.133509
	K07052	0.349283	0.013898	0.133509
	K02680	-0.712336	0.0139078	0.133509
	K09730	0.711333	0.0141046	0.134876
	K01759	0.348424	0.0141504	0.134876
	K02804	0.363303	0.0141673	0.134876
	K07053	0.348316	0.0141823	0.134876
	K03265	0.710347	0.0143003	0.134876
	K07035	0.347858	0.0143185	0.134876
	K11004	0.710046	0.0143603	0.134876
	K02895	0.347675	0.0143733	0.134876
	K19411	0.393983	0.0143874	0.134876
	K19225	0.347601	0.0143957	0.134876
	K01572	0.347599	0.014396	0.134876
	K03060	0.347426	0.0144481	0.135069
	K03217	0.347227	0.0145081	0.135236
	K00336	0.347158	0.0145289	0.135236
	K16898	0.346882	0.0146127	0.135721
	K01626	0.346723	0.0146612	0.135877
	K09857	-0.536457	0.0147481	0.136158
	K03616	0.346416	0.0147549	0.136158
	K07346	-0.70777	0.0148203	0.136468
	K00209	0.345964	0.0148941	0.136672
	K01810	0.345924	0.0149065	0.136672
	K21029	-0.455181	0.0149381	0.136672
	K03584	0.345612	0.0150031	0.136901
	K03856	0.345508	0.0150356	0.136901
	K22131	-0.61311	0.0150806	0.136901
	K05810	0.34525	0.0151162	0.136901
	K02556	-0.386351	0.0151226	0.136901
	K00147	0.345091	0.0151661	0.136936
	K02961	0.344923	0.0152188	0.136936
	K02991	0.705731	0.0152415	0.136936
	K17828	0.344811	0.0152541	0.136936
	K06310	0.344634	0.01531	0.137151
	K03184	-0.509344	0.0154691	0.138288
	K02323	0.704405	0.0155198	0.138453
	K03101	0.343866	0.0155546	0.138475
	K06902	0.343546	0.0156573	0.138858
	K07017	0.652365	0.0156624	0.138858
	K08659	0.343371	0.0157141	0.139029
	K00602	0.343186	0.0157738	0.13927
	K13283	-0.429754	0.0158278	0.13946
	K03619	-0.608774	0.0160175	0.140843
	K03075	0.342156	0.016111	0.141375
	K14762	-0.543538	0.0161582	0.1415
	K01421	0.341832	0.0162186	0.141537
	K16785	0.341802	0.0162285	0.141537
	K00763	0.34168	0.016269	0.141603
	K02906	0.341452	0.0163451	0.141886
	K01070	-0.457703	0.0163676	0.141886
	K02687	0.341188	0.0164337	0.142005
	K02907	0.341133	0.0164523	0.142005
	K20444	0.341048	0.0164806	0.142005
	K09126	0.699541	0.0165724	0.142392
	K06976	0.647793	0.0166614	0.142392
	K03330	0.699104	0.0166694	0.142392
	K07592	-0.504394	0.0166742	0.142392
	K20862	-0.448348	0.0167178	0.142392
	K18933	0.698852	0.0167255	0.142392
	K01496	0.339979	0.0168441	0.142392
	K09612	-0.554867	0.016845	0.142392
	K01087	-0.48279	0.0168671	0.142392
	K05349	0.339879	0.0168786	0.142392
	K04760	-0.419343	0.0168906	0.142392
	K06194	-0.514512	0.0170145	0.142994
	K01267	0.339444	0.0170287	0.142994
	K01924	0.339014	0.0171781	0.143967
	K00548	0.338383	0.0173994	0.145141
	K01698	0.33818	0.0174711	0.145141
	K06989	0.393822	0.0174789	0.145141
	K00762	0.338152	0.0174809	0.145141
	K06967	0.338068	0.0175106	0.145141
	K01252	-0.490334	0.017532	0.145141
	K03502	0.337944	0.0175549	0.145141
	K18141	-0.47009	0.0177286	0.146295
	K04015	-0.478973	0.0178853	0.146936
	K00767	0.336961	0.017907	0.146936
	K20542	-0.460485	0.017919	0.146936
	K02025	0.336725	0.0179926	0.146936
	K01921	0.336714	0.0179964	0.146936
	K03570	0.336672	0.0180117	0.146936
	K01804	0.336399	0.0181112	0.147289
	K09747	0.336365	0.0181237	0.147289
	K15635	0.336084	0.0182263	0.147843
	K10984	-0.521675	0.0183189	0.148314
	K11072	0.335556	0.0184209	0.148783
	K16787	0.335488	0.0184462	0.148783
	K04483	0.691252	0.0184829	0.148799
	K02899	0.335113	0.0185856	0.149042
	K00980	0.353454	0.0185934	0.149042
	K02071	0.33496	0.0186428	0.149042
	K07446	0.690548	0.018652	0.149042
	K09158	-0.389942	0.0187229	0.149152
	K07319	-0.449206	0.0187463	0.149152
	K07184	-0.475798	0.01877	0.149152
	K01273	0.333742	0.0191028	0.150769
	K00571	0.333734	0.019106	0.150769
	K07447	0.333734	0.0191061	0.150769
	K21698	-0.440039	0.019114	0.150769
	K03488	0.333359	0.0192496	0.151147
	K05245	-0.432046	0.0192579	0.151147
	K07119	-0.576895	0.0193051	0.151147
	K02846	-0.46452	0.0193151	0.151147
	K02954	0.333129	0.0193381	0.151147
	K07576	0.332703	0.0195029	0.151941
	K18988	-0.446366	0.0196018	0.151941
	K03501	0.33244	0.0196056	0.151941
	K14941	0.686643	0.0196105	0.151941
	K02682	-0.446317	0.0196167	0.151941
	K01897	0.332227	0.0196888	0.152225
	K03439	0.33197	0.0197897	0.15224
	K03579	-0.492778	0.0198019	0.15224
	K01934	0.331929	0.0198058	0.15224
	K02988	0.33186	0.0198327	0.15224
	K07080	0.335109	0.0198978	0.152425
	K22605	0.462457	0.0199315	0.152425
	K03304	-0.453532	0.0199634	0.152425
	K08301	0.331273	0.0200654	0.152932
	K00053	0.331059	0.0201506	0.153309
	K00128	0.330899	0.0202147	0.153524
	K03446	-0.390701	0.0203104	0.153979
	K09735	0.683619	0.0203766	0.154085
	K03711	0.330438	0.0203999	0.154085
	K03576	-0.384948	0.0204322	0.154085
	K17992	0.33703	0.0205268	0.154527
	K00806	0.329877	0.0206274	0.154798
	K08225	-0.459846	0.0207344	0.154798
	K02363	-0.37376	0.0208039	0.154798
	K03544	0.329329	0.0208513	0.154798
	K12952	0.329212	0.0208998	0.154798
	K19802	0.329185	0.0209107	0.154798
	K17759	0.32904	0.0209708	0.154798
	K02950	0.328742	0.0210938	0.154798
	K01752	0.328724	0.0211012	0.154798
	K03705	0.328682	0.0211188	0.154798
	K21966	-0.467846	0.0211422	0.154798
	K15836	-0.477594	0.0211825	0.154798
	K02113	0.328524	0.0211847	0.154798
	K05777	-0.488104	0.0211867	0.154798
	K01195	0.328468	0.0212079	0.154798
	K12149	-0.449393	0.0212686	0.154798
	K01995	0.328317	0.0212708	0.154798
	K07357	-0.499024	0.0212835	0.154798
	K05365	-0.467321	0.021307	0.154798
	K10794	0.710366	0.021325	0.154798
	K02314	0.328139	0.0213453	0.154798
	K00973	0.328113	0.0213564	0.154798
	K05591	-0.509998	0.0216018	0.156168
	K03545	0.327473	0.0216264	0.156168
	K03708	-0.35348	0.0216546	0.156168
	K00651	0.326909	0.0218663	0.156552
	K00766	0.326895	0.0218723	0.156552
	K02913	0.326844	0.021894	0.156552
	K01876	0.326806	0.0219105	0.156552
	K07557	0.677688	0.0219406	0.156552
	K06197	-0.584974	0.0219844	0.156552
	K05350	0.329973	0.0219969	0.156552
	K01023	0.333285	0.0220651	0.156552
	K07335	0.326417	0.0220778	0.156552
	K06863	0.676965	0.022137	0.156552
	K04091	-0.485003	0.0221475	0.156552
	K20074	0.326215	0.0221649	0.156552
	K21695	-0.423106	0.0222031	0.156552
	K20534	0.336504	0.0222187	0.156552
	K16899	0.325897	0.022303	0.156605
	K02190	0.34776	0.0223093	0.156605
	K02823	0.325822	0.0223356	0.156605
	K08172	-0.42247	0.0224259	0.156851
	K07666	-0.429766	0.0224602	0.156851
	K00927	0.325491	0.0224804	0.156851
	K00116	-0.45374	0.0227146	0.158228
	K01608	-0.43644	0.0228469	0.15888
	K03459	-0.674261	0.0228823	0.15888
	K19965	0.54724	0.0229914	0.15893
	K07023	0.324331	0.0229929	0.15893
	K03588	0.324314	0.0230006	0.15893
	K00556	-0.349852	0.0231362	0.15961
	K00537	0.323856	0.0232057	0.159832
	K00058	0.323577	0.0233317	0.160279
	K07480	-0.388047	0.0233453	0.160279
	K02304	0.330091	0.0234526	0.16056
	K10439	0.323291	0.023461	0.16056
	K02626	0.672072	0.0234989	0.160563
	K06207	0.323108	0.0235443	0.160582
	K03796	-0.451216	0.0235765	0.160582
	K11530	-0.480351	0.0236541	0.160723
	K15034	-0.46989	0.023672	0.160723
	K11748	-0.433599	0.023852	0.16125
	K07290	-0.469308	0.0238692	0.16125
	K03410	0.32226	0.0239331	0.16125
	K11191	-0.619311	0.0239949	0.16125
	K11192	-0.619311	0.0239949	0.16125
	K19119	0.322045	0.0240323	0.16125
	K22223	0.669938	0.0241108	0.16125
	K07574	0.321837	0.0241288	0.16125
	K08722	0.321836	0.0241296	0.16125
	K18672	0.321759	0.0241652	0.16125
	K07648	-0.501701	0.0242062	0.16125
	K05984	-0.478643	0.0242274	0.16125
	K05341	0.351414	0.024262	0.16125
	K00290	0.331788	0.0242846	0.16125
	K02034	0.321441	0.0243134	0.16125
	K01928	0.321298	0.0243805	0.161445
	K13639	-0.416883	0.0244633	0.16165
	K02990	0.321072	0.0244867	0.16165
	K08484	-0.44813	0.0246664	0.162488
	K16263	-0.416287	0.0246894	0.162488
	K19294	0.320495	0.0247593	0.162698
	K03567	-0.430824	0.0248685	0.162955
	K03976	0.320253	0.0248743	0.162955
	K06077	-0.540823	0.0249843	0.16303
	K10206	0.319998	0.0249964	0.16303
	K01868	0.319751	0.025115	0.16303
	K19166	-0.476042	0.0251215	0.16303
	K01483	-0.438154	0.0251656	0.16303
	K21967	-0.438089	0.0251896	0.16303
	K10975	-0.475788	0.0252101	0.16303
	K13892	-0.511424	0.0252151	0.16303
	K07137	0.319516	0.0252277	0.16303
	K07391	0.319341	0.0253126	0.163333
	K02037	0.318909	0.0255223	0.163988
	K00672	0.665143	0.0255272	0.163988
	K04797	0.665138	0.0255288	0.163988
	K11066	-0.474655	0.0256092	0.164258
	K09136	-0.387964	0.0256847	0.164497
	K19975	-0.613481	0.0257505	0.164529
	K08744	0.321703	0.0257663	0.164529
	K05804	-0.484692	0.0259585	0.164982
	K15550	-0.484674	0.0259648	0.164982
	K01815	0.317873	0.0260311	0.164982
	K07095	0.31786	0.0260375	0.164982
	K03790	0.317801	0.0260669	0.164982
	K00928	0.317799	0.0260679	0.164982
	K06155	-0.40562	0.0261587	0.165192
	K02904	0.317577	0.0261781	0.165192
	K17938	-0.536797	0.0263012	0.165224
	K19234	-0.452703	0.0263289	0.165224
	K16927	0.351083	0.0263323	0.165224
	K02759	-0.334769	0.0263372	0.165224
	K01139	-0.40495	0.0264305	0.165567
	K09167	-0.404796	0.0264933	0.165676
	K10544	-0.411424	0.0265978	0.165676
	K08972	0.33042	0.026635	0.165676
	K02004	0.316631	0.0266521	0.165676
	K09910	-0.379918	0.0266734	0.165676
	K08217	0.316577	0.0266796	0.165676
	K06893	0.425929	0.0267472	0.165856
	K09022	0.316194	0.0268736	0.166125
	K02881	0.316174	0.0268839	0.166125
	K09787	0.316114	0.0269147	0.166125
	K02986	0.316053	0.0269455	0.166125
	K03205	0.31589	0.0270285	0.166346
	K05501	-0.3845	0.0271517	0.166346
	K19405	0.349297	0.0271604	0.166346
	K00171	0.329343	0.0271631	0.166346
	K06889	0.315604	0.0271752	0.166346
	K12308	0.31547	0.0272443	0.166532
	K04068	0.315303	0.0273302	0.166709
	K08194	-0.440973	0.0273509	0.166709
	K09882	-0.549559	0.0274433	0.167035
	K01937	0.314874	0.0275521	0.167459
	K07113	-0.449054	0.0277203	0.168243
	K04083	0.31432	0.027841	0.1683
	K02339	-0.42313	0.0278718	0.1683
	K09892	-0.388685	0.0279121	0.1683
	K07641	-0.547936	0.0279979	0.1683
	K03451	0.31402	0.0279985	0.1683
	K15738	0.313942	0.0280397	0.1683
	K06990	0.606108	0.0281042	0.1683
	K10013	-0.467856	0.028109	0.1683
	K10014	-0.430554	0.0281145	0.1683
	K07703	-0.490377	0.0281549	0.1683
	K09693	0.313712	0.0281611	0.1683
	K01299	0.351239	0.0283428	0.16876
	K04753	-0.429942	0.0283636	0.16876
	K02072	0.313327	0.0283652	0.16876
	K22718	-0.605228	0.0283954	0.16876
	K12528	-0.466725	0.0285432	0.169048
	K02010	0.319576	0.0285472	0.169048
	K02313	0.312958	0.028562	0.169048
	K23016	-0.530099	0.0286104	0.169101
	K06205	-0.446458	0.0287456	0.169579
	K03823	0.312511	0.0288021	0.169579
	K05833	0.312473	0.0288227	0.169579
	K04070	0.318832	0.02894	0.169579
	K19304	-0.455515	0.0289421	0.169579
	K07407	0.312212	0.0289634	0.169579
	K00674	0.312002	0.0290776	0.169579
	K05364	0.332981	0.0291211	0.169579
	K13629	-0.465215	0.0291308	0.169579
	K02031	0.311857	0.0291567	0.169579
	K01620	0.311796	0.0291897	0.169579
	K14623	0.315008	0.0292007	0.169579
	K22051	-0.465026	0.029205	0.169579
	K10440	0.311447	0.0293805	0.170025
	K01265	0.311425	0.0293923	0.170025
	K02982	0.31141	0.0294007	0.170025
	K01464	0.311234	0.0294973	0.170211
	K02337	0.311207	0.0295123	0.170211
	K06183	0.311042	0.0296026	0.17033
	K16786	0.311025	0.0296123	0.17033
	K03580	-0.404195	0.0296551	0.170348
	K01480	0.310832	0.0297191	0.170487
	K01061	-0.443695	0.0298698	0.171123
	K03234	0.651376	0.0299196	0.17118
	K19997	-0.362048	0.0300193	0.171522
	K11074	-0.452588	0.0301218	0.171878
	K02357	0.309889	0.030244	0.172347
	K06287	0.309666	0.0303695	0.172513
	K03414	-0.484541	0.0303785	0.172513
	K03807	-0.433425	0.0304315	0.172513
	K01419	-0.33428	0.0304893	0.172513
	K00925	0.309441	0.0304965	0.172513
	K00042	-0.377062	0.0305341	0.172513
	K16703	-0.510112	0.0305545	0.172513
	K06881	0.309181	0.030644	0.172651
	K15921	0.36073	0.0306679	0.172651
	K02322	0.649083	0.0306997	0.172651
	K06404	0.30875	0.0308894	0.173279
	K02315	0.308745	0.0308922	0.173279
	K08096	0.648176	0.031012	0.173724
	K07003	0.308375	0.0311039	0.173767
	K01571	0.308361	0.0311119	0.173767
	K12292	-0.69697	0.0311411	0.173767
	K06180	0.308176	0.0312185	0.173972
	K22927	0.307781	0.0314468	0.174106
	K17758	0.307716	0.0314844	0.174106
	K07646	0.3077	0.0314936	0.174106
	K04484	0.646789	0.0314941	0.174106
	K18014	0.31079	0.0315541	0.174106
	K09800	-0.393224	0.0315782	0.174106
	K01631	-0.481524	0.031581	0.174106
	K02867	0.307506	0.0316066	0.174106
	K00134	0.307393	0.031672	0.174106
	K01214	0.307256	0.0317523	0.174106
	K01885	0.307254	0.0317533	0.174106
	K06411	0.31709	0.0317796	0.174106
	K00096	0.313597	0.0318336	0.174106
	K07323	-0.399359	0.0318553	0.174106
	K11931	-0.506723	0.0318672	0.174106
	K03518	0.306765	0.0320404	0.174106
	K13747	0.306764	0.0320406	0.174106
	K00690	0.309947	0.0320425	0.174106
	K02062	-0.468791	0.0320617	0.174106
	K07470	-0.413313	0.0321228	0.174106
	K09996	-0.42118	0.0321287	0.174106
	K10778	-0.492514	0.0321701	0.174106
	K04794	0.327273	0.0321757	0.174106
	K17105	0.644495	0.0323027	0.174293
	K03282	0.306309	0.0323096	0.174293
	K01499	0.644357	0.0323519	0.174293
	K11473	-0.520027	0.0323727	0.174293
	K10804	-0.384787	0.0325629	0.175097
	K07245	-0.478854	0.0326758	0.175213
	K18765	-0.437079	0.0327046	0.175213
	K16322	-0.419908	0.032707	0.175213
	K03618	-0.490965	0.0327998	0.175491
	K02346	0.305395	0.0328552	0.175569
	K10540	0.305313	0.0329047	0.175614
	K06921	0.305044	0.0330671	0.176262
	K21084	-0.427195	0.0331786	0.176291
	K01659	-0.47736	0.0333014	0.176291
	K02518	0.304584	0.0333455	0.176291
	K01081	0.383101	0.0333968	0.176291
	K14761	0.304488	0.0334044	0.176291
	K09937	-0.383078	0.0334084	0.176291
	K01629	0.304449	0.0334281	0.176291
	K05343	0.376962	0.0334415	0.176291
	K03325	0.317588	0.0335138	0.176291
	K02495	-0.382752	0.0335719	0.176291
	K06409	0.304193	0.0335842	0.176291
	K07321	0.304051	0.0336713	0.176291
	K00826	0.304024	0.0336884	0.176291
	K07056	0.303986	0.0337117	0.176291
	K10192	0.307122	0.0337264	0.176291
	K16248	0.332388	0.0337298	0.176291
	K11926	-0.409272	0.0340172	0.177008
	K05541	-0.47567	0.0340199	0.177008
	K03433	0.639738	0.0340261	0.177008
	K16088	-0.487903	0.0340731	0.177008
	K19803	-0.453389	0.0340734	0.177008
	K01766	-0.567806	0.0341669	0.17728
	K07675	-0.433618	0.0342707	0.177565
	K03723	0.302995	0.0343247	0.177565
	K06199	0.302877	0.0343981	0.177565
	K11685	-0.452618	0.0344175	0.177565
	K05895	0.31605	0.0344288	0.177565
	K01755	0.302741	0.0344832	0.177632
	K03535	-0.374725	0.0345914	0.177832
	K01756	0.302529	0.0346161	0.177832
	K00656	0.302481	0.0346463	0.177832
	K02112	0.302315	0.0347506	0.17808
	K03819	-0.441857	0.0347778	0.17808
	K00230	-0.432303	0.0348811	0.178148
	K13527	0.32637	0.0349072	0.178148
	K02494	-0.415211	0.0349155	0.178148
	K08308	-0.407193	0.0350267	0.178503
	K08160	-0.406915	0.0351631	0.178985
	K03609	0.301512	0.035259	0.179261
	K09902	-0.385482	0.0354016	0.179773
	K02860	0.301128	0.0355049	0.180085
	K00998	-0.406026	0.0356034	0.180371
	K02160	0.300769	0.0357354	0.180742
	K03675	-0.421703	0.035761	0.180742
	K22719	-0.439545	0.0358514	0.180986
	K04691	-0.44901	0.036063	0.181841
	K06219	-0.412754	0.0361176	0.181871
	K03498	0.300123	0.0361539	0.181871
	K12500	-0.41237	0.0363082	0.182034
	K06192	-0.459082	0.0363097	0.182034
	K02995	0.607088	0.0363134	0.182034
	K05517	-0.412199	0.0363937	0.182223
	K20373	0.371054	0.0365476	0.182611
	K07025	0.299476	0.0365764	0.182611
	K07058	0.299438	0.0366015	0.182611
	K12960	0.30245	0.036671	0.182611
	K07456	0.299264	0.0367161	0.182611
	K02922	0.582297	0.0367899	0.182611
	K08304	-0.437502	0.0368222	0.182611
	K02461	-0.494825	0.0368231	0.182611
	K03402	0.299055	0.0368542	0.182611
	K08369	0.298643	0.037127	0.183399
	K05275	-0.436819	0.037151	0.183399
	K09016	-0.480849	0.0371514	0.183399
	K18955	0.315085	0.0372271	0.183399
	K19090	0.523866	0.0372684	0.183399
	K02652	0.298406	0.0372853	0.183399
	K21905	-0.456856	0.037343	0.183399
	K00610	0.298301	0.037355	0.183399
	K00335	0.298147	0.0374579	0.183494
	K11932	-0.388156	0.03746	0.183494
	K19745	-0.387806	0.037647	0.183916
	K01784	0.297864	0.0376481	0.183916
	K12146	-0.58011	0.0376748	0.183916
	K09975	-0.479315	0.0378486	0.184555
	K03335	0.306744	0.0381289	0.185519
	K03119	-0.408772	0.0381351	0.185519
	K11933	-0.400949	0.0382018	0.185519
	K05790	-0.416668	0.038267	0.185519
	K19171	0.386635	0.0382782	0.185519
	K00821	0.296893	0.0383058	0.185519
	K03291	-0.465863	0.038433	0.185926
	K00001	0.346335	0.0385273	0.186172
	K02467	-0.399634	0.0388991	0.187733
	K04800	0.627004	0.0389541	0.187733
	K03736	0.29897	0.038999	0.187733
	K04043	0.295847	0.0390253	0.187733
	K02433	0.295651	0.0391614	0.188176
	K03670	-0.432426	0.0393233	0.188743
	K11924	-0.349692	0.039476	0.188948
	K12961	-0.365807	0.0394978	0.188948
	K05832	0.295074	0.0395642	0.188948
	K03472	-0.371567	0.0395781	0.188948
	K07469	0.295011	0.0396082	0.188948
	K11938	-0.384179	0.0396302	0.188948
	K12147	-0.475353	0.0396957	0.18905
	K02356	0.294727	0.0398077	0.189373
	K09946	-0.339288	0.0399412	0.189717
	K01925	0.294456	0.039999	0.189717
	K03478	-0.390345	0.0400126	0.189717
	K03828	-0.413115	0.0401172	0.189836
	K00820	0.294196	0.0401832	0.189836
	K00937	0.294157	0.0402109	0.189836
	K09978	-0.474265	0.0402147	0.189836
	K06175	-0.404452	0.040424	0.190383
	K01223	0.293813	0.0404559	0.190383
	K02110	0.293786	0.0404752	0.190383
	K01869	0.293667	0.04056	0.190383
	K03210	0.293664	0.0405622	0.190383
	K02963	0.293535	0.0406547	0.190383
	K01246	0.29349	0.0406869	0.190383
	K01689	0.293387	0.0407605	0.190383
	K15777	-0.389003	0.0407616	0.190383
	K12410	0.29336	0.0407798	0.190383
	K02987	0.622427	0.0408402	0.190383
	K03571	0.29313	0.0409452	0.190383
	K11073	-0.369181	0.040965	0.190383
	K00661	0.293072	0.0409875	0.190383
	K16140	-0.420045	0.0409959	0.190383
	K06158	0.292997	0.0410412	0.190387
	K01736	0.292924	0.041094	0.190399
	K07710	-0.449009	0.0411693	0.190399
	K16511	0.292807	0.0411788	0.190399
	K03543	-0.31259	0.0412662	0.190399
	K02189	0.29267	0.0412777	0.190399
	K02662	0.302083	0.0413119	0.190399
	K08137	-0.410811	0.0413545	0.190399
	K03630	0.292391	0.0414812	0.190485
	K13654	-0.550166	0.0415069	0.190485
	K01443	0.292348	0.0415121	0.190485
	K21948	-0.45945	0.0415506	0.190485
	K03671	0.292148	0.0416579	0.190546
	K11176	0.620397	0.0416968	0.190546
	K03757	-0.394496	0.0417208	0.190546
	K01358	0.291998	0.0417682	0.190546
	K11936	-0.458981	0.0417859	0.190546
	K11935	-0.447335	0.042024	0.191428
	K01595	0.297127	0.0425387	0.192468
	K05775	-0.400514	0.0426044	0.192468
	K09017	-0.35502	0.0426236	0.192468
	K02115	0.290768	0.0426768	0.192468
	K06187	0.290761	0.0426823	0.192468
	K05303	0.372429	0.0426857	0.192468
	K03970	-0.40833	0.0427205	0.192468
	K14155	0.290674	0.0427475	0.192468
	K14059	-0.528675	0.0427492	0.192468
	K05851	-0.378655	0.0428101	0.192468
	K08591	0.290572	0.0428232	0.192468
	K12962	-0.400103	0.0428376	0.192468
	K01056	0.290481	0.0428916	0.192468
	K09898	-0.349273	0.0428996	0.192468
	K19267	-0.378455	0.0429288	0.192468
	K01669	-0.528201	0.0429701	0.192468
	K19955	0.29009	0.0431849	0.193163
	K03655	0.29005	0.0432153	0.193163
	K02362	-0.495077	0.0433246	0.19345
	K07584	0.289821	0.0433876	0.193531
	K00161	-0.589474	0.0436829	0.194645
	K07464	0.292253	0.0438354	0.194972
	K03636	-0.353084	0.0438472	0.194972
	K00059	0.289152	0.0438957	0.194986
	K01874	0.289028	0.0439906	0.195206
	K04750	-0.363995	0.0441141	0.195551
	K21636	0.288711	0.0442337	0.195838
	K12944	-0.363674	0.0443153	0.195838
	K11736	-0.40551	0.0443158	0.195838
	K02746	0.319572	0.0444193	0.196094
	K03530	0.288321	0.0445337	0.196397
	K04046	-0.4652	0.0447462	0.197132
	K01146	-0.375371	0.0447954	0.197141
	K15833	-0.368908	0.0448426	0.197141
	K01420	0.287777	0.0449556	0.197141
	K02423	-0.452833	0.0449681	0.197141
	K06200	0.287748	0.0449782	0.197141
	K01996	0.287349	0.045289	0.198206
	K04063	-0.42121	0.0453234	0.198206
	K00204	0.612024	0.0453612	0.198206
	K01591	0.2872	0.0454059	0.198206
	K03148	-0.380776	0.0456035	0.198742
	K07045	0.286926	0.0456212	0.198742
	K09159	-0.380542	0.045748	0.199092
	K12152	-0.402894	0.0458372	0.199278
	K09933	-0.373427	0.046004	0.199474
	K03550	0.286404	0.0460337	0.199474
	K15869	-0.584094	0.0461301	0.199474
	K09911	-0.379816	0.046197	0.199474
	K11391	-0.373103	0.0462081	0.199474
	K03525	0.286178	0.0462135	0.199474
	K02683	0.610092	0.0462373	0.199474
	K04077	0.286079	0.0462919	0.199474
	K21397	0.309203	0.0463144	0.199474
	K01714	0.28601	0.0463472	0.199474
	K03805	-0.401932	0.046407	0.199532

## Sheet: TableS8
	Table S8: Significant HEI-gene family interactions.
	Gene (KEGG Ortholog)	Interaction Strength (Rho)	p value	False discovery rate (FDR)
	K03572	0.590043	8.12565e-06	0.025503
	K03215	0.581285	1.18867e-05	0.025503
	K03320	0.533969	7.77159e-05	0.0865253
	K07056	0.527325	9.8966e-05	0.0865253
	K15532	0.641437	0.000100822	0.0865253
	K10206	0.508961	0.000188162	0.0961084
	K07001	0.508287	0.000192523	0.0961084
	K06412	0.506753	0.000202782	0.0961084
	K00794	0.503179	0.000228649	0.0961084
	K01338	0.501853	0.000238982	0.0961084
	K18332	0.519556	0.000254778	0.0961084
	K00800	0.495697	0.000292723	0.0961084
	K00566	0.495288	0.000296651	0.0961084
	K09748	0.493017	0.000319366	0.0961084
	K07456	0.487637	0.000379583	0.0961084
	K08363	0.795353	0.000392626	0.0961084
	K03580	-0.614247	0.000393182	0.0961084
	K11072	0.48574	0.000403158	0.0961084
	K00133	0.483559	0.000431882	0.0975372
	K01817	0.478998	0.000498002	0.106846
	K15600	0.519824	0.000586623	0.114309
	K00957	0.473633	0.000587371	0.114309
	K00661	0.468393	0.000688359	0.114309
	K09971	-0.641148	0.000735281	0.114309
	K15598	0.474837	0.00074513	0.114309
	K09861	0.464866	0.000764844	0.114309
	K02687	0.464753	0.000767413	0.114309
	K01955	0.462751	0.000814291	0.114309
	K01778	0.462664	0.000816385	0.114309
	K08303	0.460935	0.000858999	0.114309
	K00606	0.459545	0.000894717	0.114309
	K01733	0.45726	0.000956327	0.114309
	K02823	0.457219	0.000957445	0.114309
	K09975	-0.694164	0.00097635	0.114309
	K01939	0.455846	0.000996327	0.114309
	K04075	0.455395	0.00100938	0.114309
	K03808	-0.626794	0.00104729	0.114309
	K01868	0.453469	0.00106695	0.114309
	K10539	-0.648588	0.00109452	0.114309
	K15772	0.451958	0.00111413	0.114309
	K03977	0.450631	0.00115712	0.114309
	K06213	0.453103	0.00122091	0.114309
	K18330	0.487025	0.00124129	0.114309
	K21470	-0.588181	0.00125204	0.114309
	K03527	0.44696	0.00128381	0.114309
	K01056	0.446408	0.00130391	0.114309
	K03308	0.44577	0.00132747	0.114309
	K00048	0.44569	0.00133044	0.114309
	K00145	0.44569	0.00133044	0.114309
	K05601	0.445649	0.00133196	0.114309
	K01881	0.444626	0.00137066	0.115324
	K01945	0.443284	0.00142295	0.117421
	K03437	0.440436	0.00153985	0.123282
	K03648	0.439427	0.00158326	0.123282
	K02959	0.437672	0.00166138	0.123282
	K03786	0.437541	0.00166734	0.123282
	K03790	0.43721	0.00168255	0.123282
	K01956	0.437175	0.00168416	0.123282
	K03429	0.436629	0.00170945	0.123282
	K10907	0.43577	0.00174993	0.123282
	K06281	-0.615271	0.00177924	0.123282
	K02846	-0.592265	0.00181314	0.123282
	K00057	0.433445	0.00186383	0.123282
	K03503	-0.499775	0.00191238	0.123282
	K01866	0.431598	0.00195894	0.123282
	K03695	0.431505	0.00196384	0.123282
	K01876	0.431302	0.00197461	0.123282
	K07674	-0.648364	0.00198832	0.123282
	K00616	0.430628	0.00201061	0.123282
	K06173	0.430176	0.0020351	0.123282
	K06392	0.430089	0.00203986	0.123282
	K01613	0.428407	0.00213348	0.12715
	K01854	0.427159	0.00220544	0.129637
	K00759	0.426431	0.00224839	0.130376
	K01754	0.424945	0.00233834	0.131654
	K02519	0.424756	0.00235005	0.131654
	K06399	0.423979	0.00239851	0.131654
	K07771	-0.625731	0.00241379	0.131654
	K21966	-0.589693	0.00242384	0.131654
	K02372	0.422427	0.0024981	0.133992
	K00954	0.421499	0.00255938	0.13404
	K01918	0.421336	0.00257025	0.13404
	K07701	-0.62228	0.00259271	0.13404
	K10773	0.419834	0.00267262	0.135072
	K01963	0.418814	0.0027442	0.135072
	K03797	0.418241	0.00278511	0.135072
	K02502	0.418163	0.00279074	0.135072
	K06320	0.526492	0.00280106	0.135072
	K00784	0.416735	0.0028953	0.135072
	K11202	-0.438516	0.00290645	0.135072
	K11066	-0.603784	0.00292555	0.135072
	K03702	0.416207	0.00293481	0.135072
	K01815	0.415901	0.00295797	0.135072
	K07407	0.415781	0.00296703	0.135072
	K04077	0.415426	0.00299413	0.135072
	K00925	0.414684	0.00305151	0.135072
	K07052	0.41466	0.00305336	0.135072
	K03643	-0.567386	0.00309659	0.135586
	K21071	0.41273	0.00320722	0.136983
	K02241	0.748281	0.00326001	0.136983
	K07192	0.424175	0.00330523	0.136983
	K07030	0.411481	0.00331038	0.136983
	K01484	-0.623025	0.0033414	0.136983
	K11749	0.410948	0.0033553	0.136983
	K06921	0.410904	0.00335903	0.136983
	K02356	0.409886	0.00344636	0.136983
	K01890	0.409358	0.00349246	0.136983
	K00299	-0.583148	0.00349401	0.136983
	K00962	0.40931	0.00349662	0.136983
	K07648	-0.620483	0.00351157	0.136983
	K09160	-0.532238	0.00355256	0.137334
	K01951	0.407241	0.0036827	0.139363
	K03282	0.407158	0.00369036	0.139363
	K06949	0.406443	0.00375675	0.139363
	K06884	-0.630331	0.00381577	0.139363
	K10544	-0.519714	0.00385863	0.139363
	K05887	-0.56695	0.00386628	0.139363
	K01811	0.40518	0.00387659	0.139363
	K00648	0.404193	0.0039726	0.139363
	K02970	0.404013	0.00399042	0.139363
	K07714	-0.613243	0.00403598	0.139363
	K13747	0.403295	0.00406184	0.139363
	K00262	0.402823	0.00410936	0.139363
	K03979	0.402691	0.00412273	0.139363
	K02313	0.402599	0.00413214	0.139363
	K01190	0.402533	0.00413886	0.139363
	K21084	-0.552799	0.0041591	0.139363
	K07171	0.401971	0.00419649	0.139363
	K11203	-0.624506	0.00425894	0.139363
	K07139	0.400935	0.00430455	0.139363
	K07283	-0.596298	0.00433066	0.139363
	K07782	-0.605195	0.0043689	0.139363
	K00850	0.400133	0.0043899	0.139363
	K02992	0.399923	0.00441245	0.139363
	K03619	-0.689902	0.00442376	0.139363
	K00014	0.399816	0.00442402	0.139363
	K01572	0.399581	0.00444947	0.139363
	K03782	-0.539001	0.00449413	0.139741
	K04343	-0.78083	0.00455803	0.140709
	K22104	-0.606243	0.0046031	0.141085
	K15868	0.479883	0.00471159	0.143386
	K03516	-0.545805	0.00476897	0.14411
	K07738	0.39444	0.00503953	0.14861
	K03478	-0.514239	0.00511841	0.14861
	K03415	0.397343	0.00516664	0.14861
	K02879	0.393372	0.0051703	0.14861
	K08591	0.393091	0.00520529	0.14861
	K09800	-0.496773	0.00522987	0.14861
	K03603	-0.531213	0.00523139	0.14861
	K01630	-0.504558	0.00525123	0.14861
	K00762	0.392623	0.00526386	0.14861
	K03776	-0.521381	0.00528872	0.14861
	K02967	0.392346	0.00529884	0.14861
	K02358	0.391428	0.00541614	0.150913
	K00651	0.390518	0.00553456	0.15234
	K02892	0.390489	0.00553835	0.15234
	K03417	-0.581735	0.00566917	0.1525
	K00163	-0.450741	0.00580074	0.1525
	K21636	0.388465	0.0058103	0.1525
	K09900	-0.507463	0.00584346	0.1525
	K02946	0.388212	0.005845	0.1525
	K14988	0.444075	0.00589919	0.1525
	K07979	0.387781	0.00590472	0.1525
	K00041	0.387304	0.00597137	0.1525
	K21088	-0.615789	0.00597476	0.1525
	K01488	0.387126	0.00599652	0.1525
	K09807	0.387004	0.00601373	0.1525
	K00692	-0.739055	0.00602782	0.1525
	K19802	0.386649	0.00606409	0.1525
	K01689	0.386517	0.00608287	0.1525
	K02227	0.386261	0.0061195	0.1525
	K14060	-0.69087	0.00622152	0.1525
	K04083	0.385441	0.00623813	0.1525
	K18890	-0.472627	0.00630388	0.1525
	K02931	0.384818	0.00632962	0.1525
	K07639	-0.602283	0.00635607	0.1525
	K04775	-0.602018	0.00638533	0.1525
	K03414	-0.587439	0.00645994	0.1525
	K01533	0.383736	0.00649137	0.1525
	K10678	-0.709767	0.0065733	0.1525
	K00835	-0.560859	0.0066194	0.1525
	K16692	-0.518468	0.00665748	0.1525
	K03438	0.382612	0.00666301	0.1525
	K01990	0.381834	0.00678418	0.1525
	K01889	0.381803	0.006789	0.1525
	K03925	0.381664	0.00681098	0.1525
	K02111	0.381532	0.00683169	0.1525
	K06960	0.381454	0.0068441	0.1525
	K17759	0.381252	0.00687612	0.1525
	K02939	0.38096	0.00692263	0.1525
	K03669	-0.525789	0.0069457	0.1525
	K06867	-0.546578	0.00696267	0.1525
	K06872	0.380267	0.00703412	0.1525
	K00604	0.380243	0.00703789	0.1525
	K18140	-0.557377	0.00703974	0.1525
	K18899	-0.626994	0.00706519	0.1525
	K03712	-0.605263	0.00709942	0.1525
	K00242	-0.53458	0.00711909	0.1525
	K00640	0.379723	0.0071226	0.1525
	K00973	0.379666	0.00713198	0.1525
	K06940	0.37935	0.00718396	0.1525
	K10202	0.661897	0.00718932	0.1525
	K03629	0.379165	0.00721452	0.1525
	K19270	-0.495893	0.00728268	0.153186
	K03596	0.378205	0.00737499	0.153321
	K04091	-0.554551	0.00739705	0.153321
	K12963	-0.494316	0.00750021	0.153321
	K14054	-0.48608	0.00750782	0.153321
	K00600	0.377399	0.00751207	0.153321
	K07124	0.377237	0.00753995	0.153321
	K00761	0.376851	0.0076066	0.153321
	K02016	0.376845	0.00760776	0.153321
	K17992	0.384493	0.00762117	0.153321
	K00951	0.376622	0.0076464	0.153321
	K01992	0.376332	0.00769715	0.153621
	K19229	-0.483836	0.00783084	0.154912
	K01736	0.375208	0.00789621	0.154912
	K13789	0.375207	0.00789623	0.154912
	K05782	-0.483239	0.00791867	0.154912
	K07703	-0.575404	0.00794233	0.154912
	K06917	-0.527621	0.00805618	0.155022
	K01657	0.374205	0.00807744	0.155022
	K12343	0.507458	0.00813998	0.155022
	K05966	-0.459564	0.0081421	0.155022
	K01571	0.373435	0.00821918	0.155022
	K03840	-0.489254	0.00823591	0.155022
	K21965	-0.560104	0.00827478	0.155022
	K02652	0.372861	0.00832613	0.155022
	K03616	0.372813	0.00833514	0.155022
	K11737	-0.480464	0.00833812	0.155022
	K01887	0.372759	0.00834538	0.155022
	K05988	0.387911	0.0084648	0.155361
	K03660	0.396507	0.00848028	0.155361
	K00757	0.37168	0.00855014	0.155361
	K09019	-0.504702	0.00855156	0.155361
	K07003	0.371464	0.00859174	0.155361
	K11747	-0.478733	0.00860909	0.155361
	K02425	-0.556855	0.00873973	0.155361
	K12143	-0.597208	0.00887243	0.155361
	K02904	0.369883	0.00890094	0.155361
	K07729	0.369569	0.00896352	0.155361
	K00937	0.369463	0.00898473	0.155361
	K01579	0.369369	0.00900366	0.155361
	K06394	0.36921	0.00903555	0.155361
	K03563	0.368992	0.00907944	0.155361
	K03217	0.368698	0.00913907	0.155361
	K01610	0.368451	0.00918947	0.155361
	K07015	0.36834	0.00921198	0.155361
	K07107	0.368205	0.0092398	0.155361
	K03819	-0.530269	0.00924613	0.155361
	K02553	-0.452879	0.00924679	0.155361
	K02232	0.367659	0.00935231	0.155361
	K00134	0.367609	0.00936266	0.155361
	K06390	0.367378	0.00941069	0.155361
	K02952	0.366657	0.00956196	0.155361
	K16898	0.366584	0.00957745	0.155361
	K02986	0.366571	0.00958033	0.155361
	K00073	-0.517504	0.00959958	0.155361
	K01069	0.365848	0.00973439	0.155361
	K08484	-0.506446	0.00978503	0.155361
	K07236	-0.449844	0.00978863	0.155361
	K09902	-0.464039	0.00979302	0.155361
	K02878	0.365444	0.00982132	0.155361
	K02954	0.365423	0.00982578	0.155361
	K13893	-0.479398	0.00984336	0.155361
	K18997	-0.549236	0.00991448	0.155361
	K01669	-0.641645	0.00992355	0.155361
	K02996	0.364938	0.00993119	0.155361
	K01218	0.388891	0.00995692	0.155361
	K00196	0.418329	0.00997687	0.155361
	K01928	0.364693	0.00998494	0.155361
	K07686	-0.622517	0.0100115	0.155361
	K01163	0.36434	0.0100626	0.155361
	K12251	0.388343	0.0100712	0.155361
	K10975	-0.542631	0.0100934	0.155361
	K09978	-0.582456	0.0101341	0.155361
	K11930	-0.574188	0.010141	0.155361
	K19335	-0.674725	0.0101486	0.155361
	K05776	-0.477416	0.0101964	0.155361
	K22605	0.503558	0.0102818	0.155361
	K06222	-0.503558	0.0102818	0.155361
	K08998	0.363251	0.0103055	0.155361
	K03824	-0.460888	0.0103706	0.155361
	K06406	0.362791	0.0104096	0.155361
	K01358	0.362655	0.0104406	0.155361
	K02000	-0.460374	0.0104674	0.155361
	K18220	0.362343	0.0105119	0.155361
	K01631	-0.558315	0.0105142	0.155361
	K16137	-0.511962	0.0105439	0.155361
	K04764	-0.459929	0.0105519	0.155361
	K09918	-0.545159	0.0105942	0.155361
	K17758	0.361863	0.0106225	0.155361
	K00864	0.361807	0.0106354	0.155361
	K08997	-0.521868	0.0106446	0.155361
	K13938	-0.532636	0.0107083	0.15542
	K11070	0.361438	0.0107211	0.15542
	K06192	-0.544037	0.0107879	0.15572
	K02399	-0.538114	0.0108341	0.15572
	K11527	0.431359	0.0108614	0.15572
	K02906	0.360732	0.010887	0.15572
	K03670	-0.519891	0.0109978	0.156368
	K19049	0.4133	0.0110052	0.156368
	K03591	-0.508371	0.0111958	0.157177
	K11939	-0.498267	0.0112463	0.157177
	K18765	-0.507937	0.0112769	0.157177
	K09712	-0.5538	0.0112959	0.157177
	K02528	0.358869	0.0113348	0.157177
	K12410	0.358848	0.0113399	0.157177
	K00180	0.358766	0.01136	0.157177
	K07459	-0.45575	0.0113735	0.157177
	K00766	0.358637	0.0113918	0.157177
	K02990	0.358352	0.0114619	0.15744
	K02100	-0.462733	0.0114842	0.15744
	K06080	-0.487346	0.0115623	0.158006
	K16088	-0.56516	0.0116848	0.159173
	K03812	-0.52697	0.0117379	0.15939
	K06387	0.35707	0.0117823	0.159488
	K03524	0.356623	0.0118957	0.160403
	K03750	0.35651	0.0119246	0.160403
	K09955	0.35579	0.0121098	0.16203
	K10003	-0.484434	0.0121447	0.16203
	K06384	0.413542	0.0121745	0.16203
	K10804	-0.444568	0.0122201	0.16203
	K00786	0.502829	0.012267	0.16203
	K02948	0.355092	0.0122918	0.16203
	K02982	0.355022	0.0123099	0.16203
	K00876	0.354391	0.0124767	0.163284
	K00858	0.354374	0.0124813	0.163284
	K06398	0.354056	0.0125659	0.163583
	K02230	0.3813	0.0127219	0.163583
	K11929	-0.521764	0.0127537	0.163583
	K11392	-0.428822	0.012773	0.163583
	K02853	-0.606328	0.0127764	0.163583
	K13695	-0.500326	0.0127776	0.163583
	K08990	-0.449143	0.0127815	0.163583
	K12217	0.644665	0.0128108	0.163583
	K00949	0.353013	0.0128472	0.163583
	K03189	0.360052	0.0129216	0.164043
	K01567	0.352579	0.0129659	0.16412
	K15342	0.352316	0.0130383	0.164551
	K08308	-0.470984	0.0131516	0.165082
	K02890	0.351869	0.0131621	0.165082
	K02466	-0.571576	0.013209	0.165082
	K10710	0.374953	0.0132342	0.165082
	K07284	0.351287	0.0133249	0.165731
	K09888	0.349893	0.0137215	0.17017
	K03468	-0.476663	0.0138189	0.170243
	K00892	-0.485571	0.0138691	0.170243
	K00700	0.349247	0.0139088	0.170243
	K05020	-0.459367	0.0139276	0.170243
	K03100	0.349128	0.0139433	0.170243
	K10973	-0.505065	0.0139654	0.170243
	K02895	0.348688	0.0140725	0.170802
	K01006	0.348625	0.0140909	0.170802
	K04486	0.348413	0.0141535	0.17083
	K01847	0.359308	0.0141911	0.17083
	K01070	-0.466331	0.0142126	0.17083
	K05591	-0.538548	0.0142918	0.171302
	K01251	0.347652	0.0143803	0.171882
	K03435	-0.45701	0.0144894	0.172706
	K02963	0.346353	0.0147743	0.175061
	K12943	-0.481631	0.0147787	0.175061
	K06042	0.349781	0.0148094	0.175061
	K09163	0.349249	0.0149725	0.176502
	K03924	0.345157	0.0151453	0.176992
	K02386	-0.470669	0.0152367	0.176992
	K09002	0.479584	0.0152702	0.176992
	K14682	-0.521457	0.0153388	0.176992
	K01835	0.344474	0.0153607	0.176992
	K03388	0.351573	0.015381	0.176992
	K03837	-0.533484	0.0154172	0.176992
	K21972	-0.520948	0.0154568	0.176992
	K09749	0.366965	0.0154966	0.176992
	K00703	0.343914	0.015539	0.176992
	K18349	0.343894	0.0155454	0.176992
	K03969	-0.452753	0.0155517	0.176992
	K03366	0.358575	0.0155743	0.176992
	K02886	0.343601	0.0156398	0.176992
	K16091	-0.532281	0.0156947	0.176992
	K02907	0.343374	0.0157129	0.176992
	K01179	0.394294	0.0157432	0.176992
	K13888	-0.513269	0.0157564	0.176992
	K02926	0.342849	0.0158835	0.177248
	K08161	-0.436408	0.0159082	0.177248
	K07788	-0.48651	0.0159206	0.177248
	K03759	-0.531027	0.0159883	0.177248
	K02114	0.342466	0.016009	0.177248
	K02083	-0.544098	0.0160271	0.177248
	K03410	0.342116	0.0161243	0.177561
	K02391	-0.60823	0.0161381	0.177561
	K01173	0.373391	0.0161893	0.177668
	K18331	0.364469	0.0162678	0.177736
	K00868	0.341584	0.0163009	0.177736
	K00998	-0.45778	0.0163473	0.177736
	K00878	0.341363	0.0163751	0.177736
	K13892	-0.542343	0.0164403	0.177736
	K01996	0.340737	0.0165857	0.177736
	K02935	0.340661	0.0166116	0.177736
	K05874	-0.555615	0.0166669	0.177736
	K01462	0.340348	0.016718	0.177736
	K11107	-0.456253	0.0167549	0.177736
	K05596	-0.440503	0.0167761	0.177736
	K03112	-0.540588	0.0168619	0.177736
	K08092	-0.515102	0.0168665	0.177736
	K08304	-0.492832	0.01688	0.177736
	K02834	0.339828	0.0168959	0.177736
	K19304	-0.492707	0.0169123	0.177736
	K00879	-0.554466	0.0169411	0.177736
	K16703	-0.554466	0.0169411	0.177736
	K00688	0.339422	0.0170361	0.178297
	K07589	-0.454559	0.0172168	0.17975
	K03561	0.338363	0.0174063	0.180617
	K07248	-0.471132	0.0174439	0.180617
	K16090	-0.538192	0.0174514	0.180617
	K07676	-0.537955	0.0175104	0.180617
	K15268	-0.537955	0.0175104	0.180617
	K03809	-0.461749	0.0175663	0.180617
	K00147	0.337671	0.0176521	0.180617
	K18141	-0.470362	0.0176539	0.180617
	K05939	-0.470271	0.0176787	0.180617
	K02410	0.337283	0.017791	0.180965
	K02298	-0.469841	0.0177971	0.180965
	K09765	0.336356	0.0181269	0.183111
	K01423	-0.509906	0.0182047	0.183111
	K11183	-0.450992	0.0182239	0.183111
	K12266	-0.442924	0.0182522	0.183111
	K02029	0.335989	0.0182612	0.183111
	K06001	0.335981	0.0182641	0.183111
	K11925	-0.46795	0.018325	0.183214
	K01961	0.335691	0.018371	0.183214
	K06997	0.335606	0.0184025	0.183214
	K12288	-0.508772	0.0185078	0.183835
	K06183	0.33518	0.0185607	0.183935
	K13542	0.338439	0.0186293	0.18419
	K07309	-0.433823	0.0187129	0.184591
	K15524	-0.678322	0.0188251	0.184826
	K00795	-0.440931	0.0188442	0.184826
	K01821	0.337778	0.0188755	0.184826
	K03607	-0.4753	0.0189119	0.184826
	K11738	-0.456644	0.0190259	0.184826
	K00096	0.340897	0.0190341	0.184826
	K05527	-0.506823	0.0190382	0.184826
	K09825	0.333759	0.0190964	0.184898
	K11529	0.347727	0.0192555	0.184898
	K02838	0.333325	0.0192627	0.184898
	K07005	0.333291	0.0192758	0.184898
	K06407	0.33324	0.0192954	0.184898
	K06140	-0.523308	0.0193447	0.184898
	K03745	-0.439151	0.0193861	0.184898
	K11742	-0.473455	0.0194451	0.184898
	K11051	0.398563	0.0195565	0.184898
	K09161	-0.431037	0.0195735	0.184898
	K19776	-0.454748	0.0195929	0.184898
	K19334	-0.559166	0.0196173	0.184898
	K12573	0.332406	0.0196188	0.184898
	K13894	-0.430614	0.0197069	0.184898
	K02911	0.332125	0.0197287	0.184898
	K06408	0.358504	0.0197351	0.184898
	K07444	0.331495	0.0199772	0.186523
	K07811	-0.503412	0.0199954	0.186523
	K15599	0.38026	0.0202536	0.188521
	K02909	0.330354	0.0204336	0.189182
	K09913	-0.421158	0.020463	0.189182
	K15828	-0.451701	0.0205324	0.189182
	K15777	-0.435437	0.0205584	0.189182
	K05804	-0.501462	0.0205601	0.189182
	K06990	0.631589	0.0205891	0.189182
	K16138	-0.512975	0.0207237	0.190012
	K01839	0.329383	0.0208293	0.190326
	K12945	-0.500488	0.0208468	0.190326
	K09934	-0.539256	0.0209172	0.190477
	K03545	0.328906	0.0210258	0.190477
	K02888	0.328857	0.0210462	0.190477
	K01611	-0.346909	0.0210523	0.190477
	K03321	0.328763	0.0210852	0.190477
	K21698	-0.432521	0.0215191	0.193489
	K07042	0.327664	0.0215453	0.193489
	K07245	-0.510158	0.0215539	0.193489
	K15832	-0.424399	0.0217555	0.194891
	K15736	-0.509214	0.021838	0.195222
	K02965	0.326577	0.0220088	0.195726
	K21087	-0.52151	0.022023	0.195726
	K07787	-0.464985	0.0220528	0.195726
	K04744	-0.496426	0.0220767	0.195726
	K06145	-0.385359	0.0222476	0.196834
	K16263	-0.422518	0.022409	0.197617
	K02003	0.325405	0.0225178	0.197617
	K07216	0.325315	0.0225574	0.197617
	K02950	0.325246	0.0225875	0.197617
	K04082	-0.414914	0.0226149	0.197617
	K03608	0.325174	0.0226195	0.197617
	K09911	-0.429198	0.0226585	0.197617
	K02867	0.324832	0.0227705	0.198001
	K02050	0.324777	0.0227949	0.198001
	K11991	0.324275	0.0230178	0.199355
	K21065	0.372731	0.0230878	0.199355
	K01647	0.324114	0.0230901	0.199355
	K05567	0.420365	0.0231766	0.1997
	K04488	0.323767	0.0232456	0.199894

## Sheet: TableS9
	Table S9: Microbiome datasets used in this study.
	Study	Study ID	Dataset	SRA	Reference
	GO study	NCT04054908	16S rRNA gene sequencing	PRJNA1169175	Trepka et al, Science Translational Medicine, 2025
	GO study	NCT04054908	Metagenomics	PRJNA1169175	Trepka et al, Science Translational Medicine, 2025
	Dutch study	NL-OMON29314/NTR6957	Metagenomics	PRJNA1171107	Hillege/Trepka et al, mBio, 2025

## Sheet: TableS10
	Table S10: Primer pairs.
	Primer	Assay	Primer sequence (5’ to 3’)	Reference
	16S_V4_515Fmod_Nextera	Amplicon seq.	TCGTCGGCAGCGTCAGATGTGTATAAGAGACAGGTGYCAGCMGCCGCGGTAA	Trepka et al, Science Translational Medicine, 2025
	16S_V4_806Rmod_Nextera	Amplicon seq.	GTCTCGTGGGCTCGGAGATGTGTATAAGAGACAGGGACTACNVGGGTWTCTAAT	Trepka et al, Science Translational Medicine, 2025
	Fn1_FWD	qPCR	CGGGTGAGTAACGCGTAAAG	Viljoen et al, PLOS One, 2015
	Fn2_REV	qPCR	GCCGTGTCTCAGTCCCCT	Viljoen et al, PLOS One, 2015
	16S_general_FWD	qPCR	TGGAGCATGTGGTTTAATTCGA	Kyaw et al, The American Journal of Clinical Nutrition, 2023
	16S_general_REV	qPCR	TGCGGGACTTAACCCAACA	Kyaw et al, The American Journal of Clinical Nutrition, 2023
